# Supplementary material for: Synthesis of fused tricyclic indolizines by intramolecular silver-mediated double cyclization of 2-(pyridin-2-yl)acetic acid propargyl esters
Source: Royal Society of Chemistry journal article supplement (doi:10.1039/c7ra00892a), 2017-01-01

# Supporting Information

## Synthesis of Fused Tricyclic Indolizines by Intramolecular Silver-Mediated Double Cyclization of 2-(Pyridin-2-yl)acetic Acid Propargyl Esters

*Hai-Yuan Zhao, Ying-chun Wang, Xiao-Lin Cao, Qiu-Fang Pang, Heng-shan Wang\**  
*and Ying-ming Pan\**

### Table of Contents

|                                                                                          |     |
|------------------------------------------------------------------------------------------|-----|
| <b>Experimental</b> .....                                                                | S2  |
| <b>General methods and materials</b> .....                                               | S2  |
| <b>General procedure for the synthesis of substrate<br/>1a</b> .....                     | S2  |
| <b>General Procedure of synthesis of fused<br/>tricyclic indolizine 2</b> .....          | S2  |
| <b>Determination of optical rotation of 2h</b> .....                                     | S3  |
| <b>Chiral HPLC experiments</b> .....                                                     | S3  |
| <b>ESI/MS experiments</b> .....                                                          | S5  |
| <b>Spectral data of all compounds</b> .....                                              | S6  |
| <b>Copies of <sup>1</sup>H NMR and <sup>13</sup>C NMR spectra of all compounds</b> ..... | S13 |

## Experimental

### General methods and materials.

Proton nuclear magnetic resonance spectra ( $^1\text{H}$  NMR) and carbon nuclear magnetic resonance spectra ( $^{13}\text{C}$  NMR) were recorded at 400 MHz and 100 MHz, respectively, using  $\text{CDCl}_3$  as reference standard ( $\delta$  7.26 ppm) for  $^1\text{H}$  NMR and ( $\delta$  77.04 ppm) for  $^{13}\text{C}$  NMR. HRMS (ion trap) were recorded using APCI or ESI. Melting points were uncorrected. Precoated silica gel plates F-254 were used for analytical thin-layer chromatography. Column chromatography was performed on silica gel (300-400 mesh). The enantiomeric excesses were determined by Agilent-1200 series HPLC system using a chiral stationary phase column. (column: CHIRALCEL OD-H, eluent: 2-propanol/*n*-hexane=5/95). Starting materials were readily prepared according to literature procedures. Unless otherwise noted, all reagents were obtained commercially and used without further purification.

### General procedure for the synthesis of substrate 1a

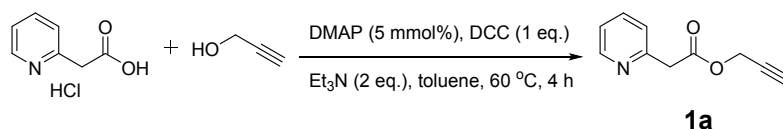

Following a modified procedure from B. Sahoo et al., triethyl amine (0.15 mL, 1.1 mmol) and 1,3-dicyclohexylcarbodiimide (DCC) (0.21 g, 1 mmol), 4-(dimethylamino)pyridine (DMAP) (6.1 mg, 0.05 mmol) were added to a suspension of 2-pyridylacetic acid hydrochloride (0.173 g, 1 mmol) and prop-2-yn-1-ol (0.056 g, 1 mmol) in toluene (10 mL) at  $60\text{ }^\circ\text{C}$ . The reaction mixture was stirred 4 h at  $60\text{ }^\circ\text{C}$ . The reaction mixture was filtered to remove 1,3-dicyclohexylurea. The filtrate was washed with water ( $3 \times 10\text{ mL}$ ), dried with  $\text{MgSO}_4$  and concentrated under reduced pressure, the crude product was purified by column chromatography on silica gel using a mixture of ethyl acetate and petroleum ether to afford **1a** as a light yellow oil.

### General procedure for the synthesis of fused tricyclic indolizine 2

Substrate **1** (0.5 mmol) were added to a suspension of  $\text{Ag}_2\text{CO}_3$  (0.276 g, 2 equiv.) and KOAc (0.098g, 2 equiv.) in toluene (2.0 mL). The reaction mixture was allowed to stir at  $100\text{ }^\circ\text{C}$  for 6 h in a sealed tube. The resulting solution was cooled and

evaporated under reduced pressure. The target product **2** was purified by column chromatography on silica gel using a mixture of ethyl acetate and petroleum ether.

### Determination of optical rotation of **2h**

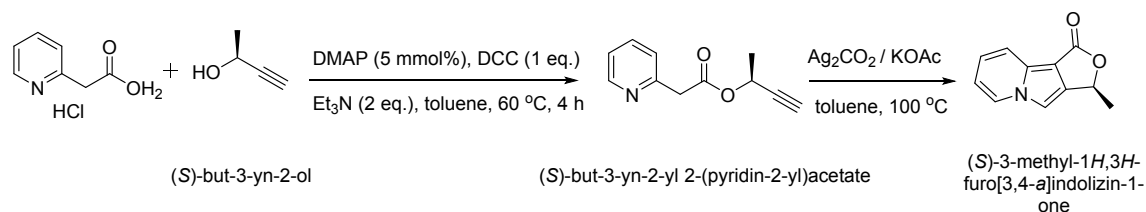

standard: 45°

Optical rotation

found: 43°

found: 55°

found: 63°

**2h** (9.3 mg) was dissolved in 3.10 mL MeOH (AR): 0.3 g/100 mL, 20 °C.

### Chiral HPLC experiments

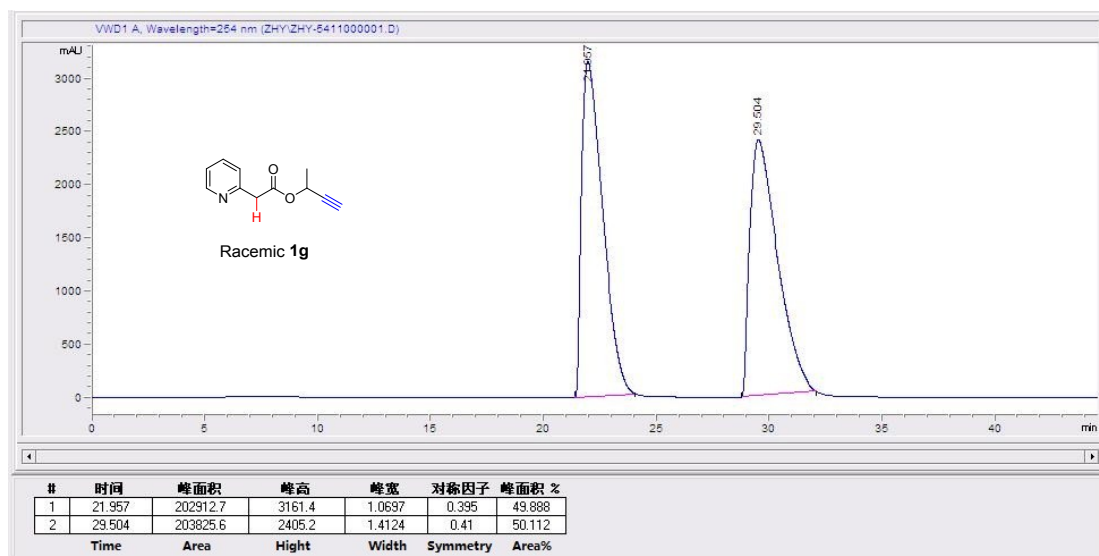

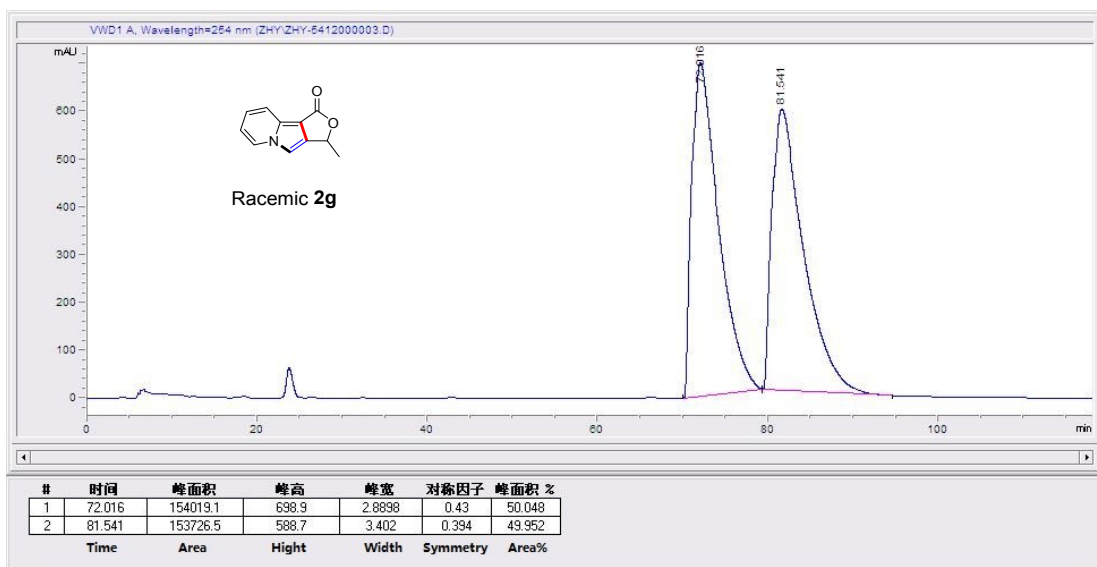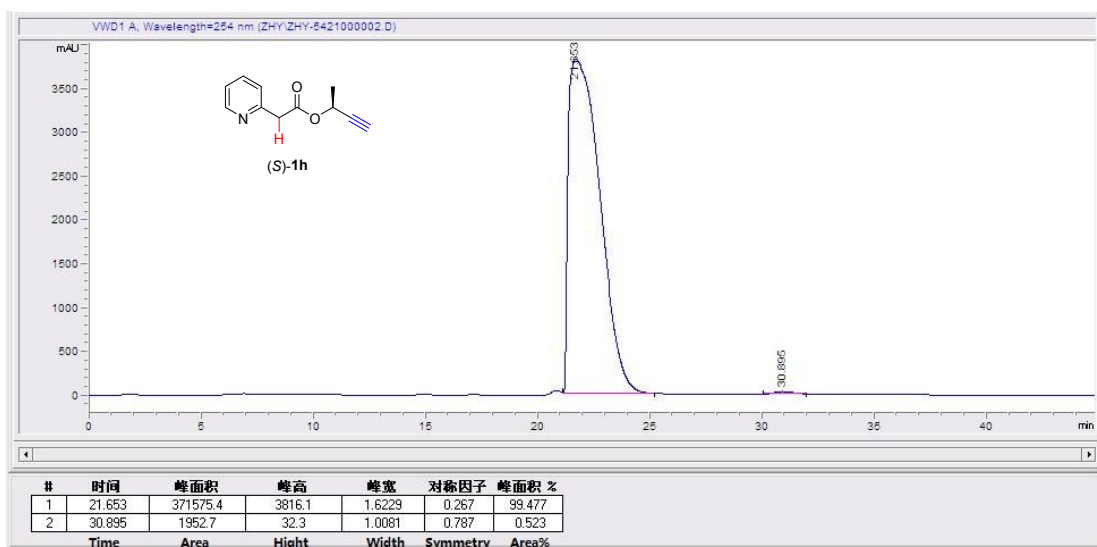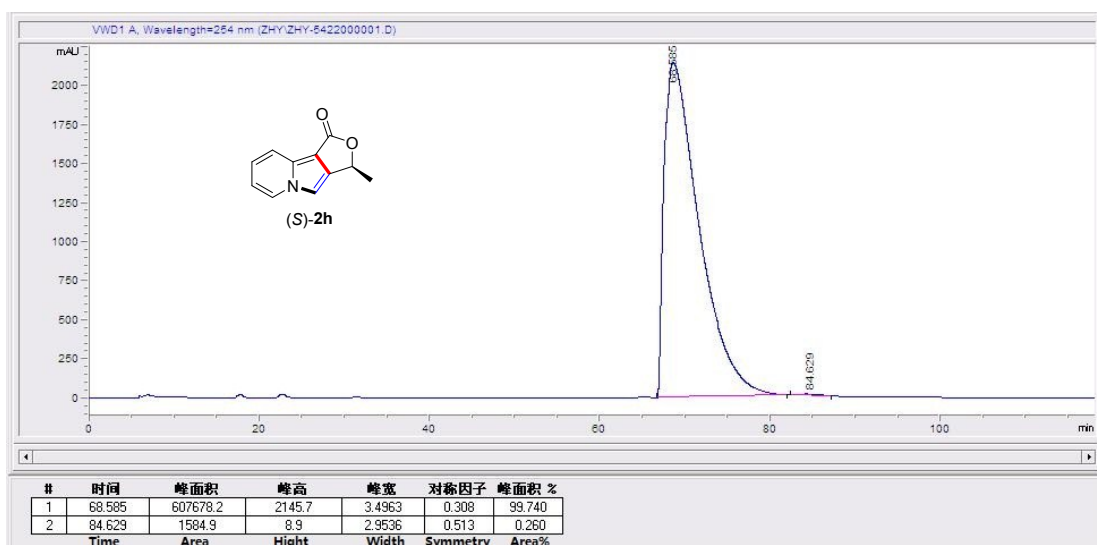

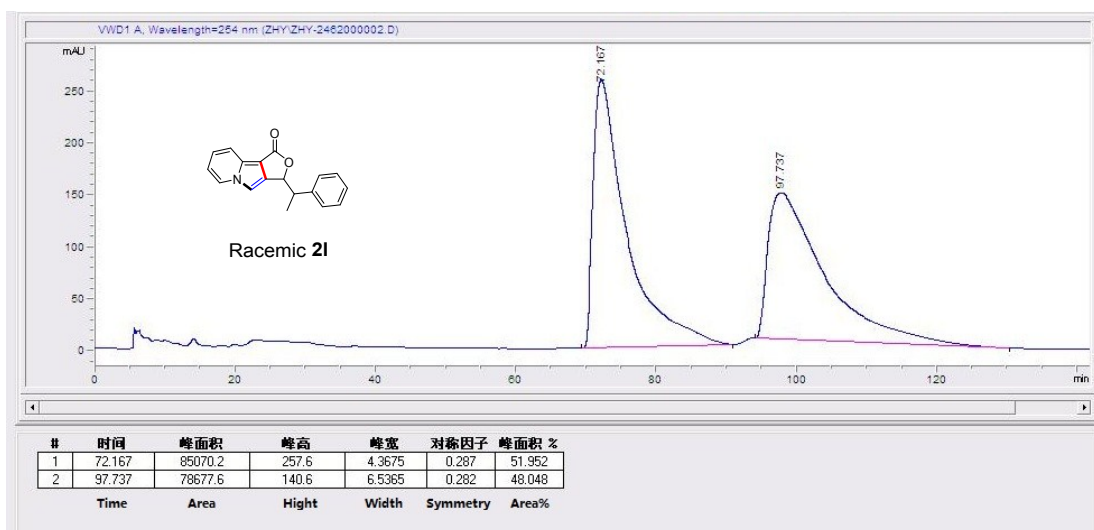

## ESI/MS experiments

Under the standard condition, a mixture of **1a** (0.5 mmol),  $\text{Ag}_2\text{CO}_3$  (0.276 g, 2 equiv.) and KOAc (0.098g, 2 equiv.) in toluene (1 mL) was reacted at 100 °C for 30 min and 50  $\mu\text{L}$  of the mixture was used for the ESI analysis in  $\text{CH}_3\text{CN}$ .

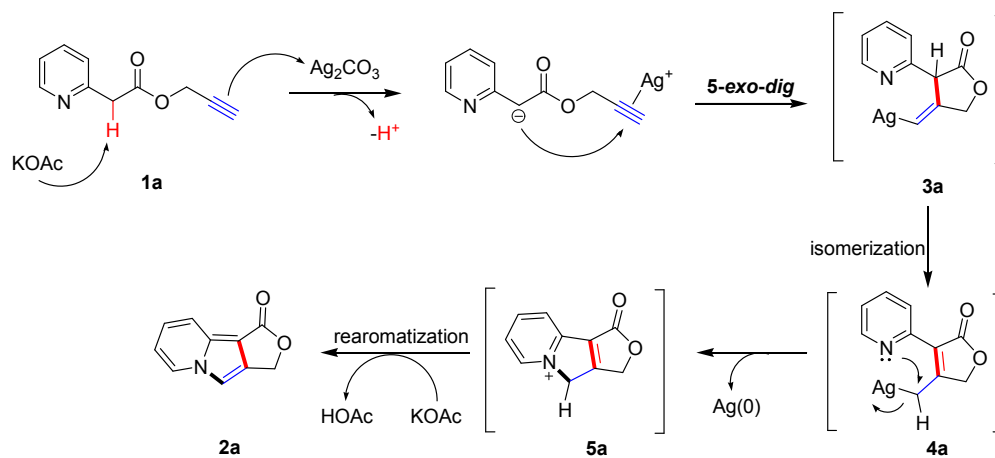

zhy-2072.5-2\_160907164604 #3 RT: 0.01 AV: 1 NL: 1.43E7  
T: FTMS + p ESI Full ms [100.00-300.00]

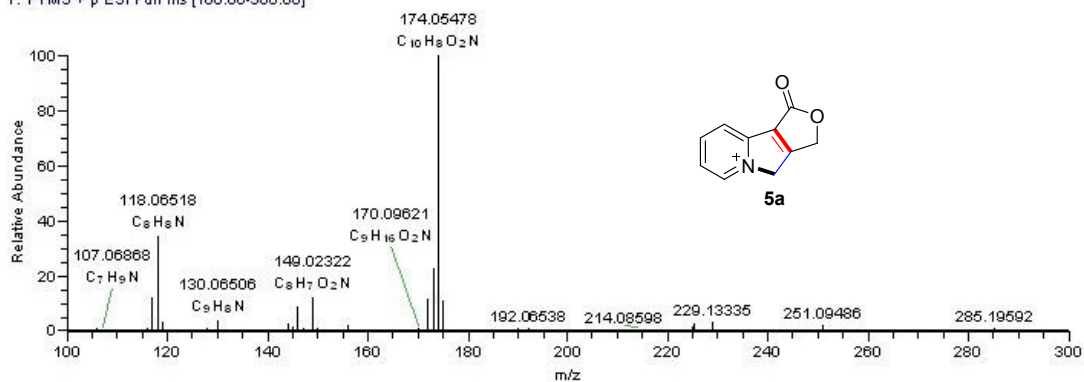



## Spectral data of all compounds

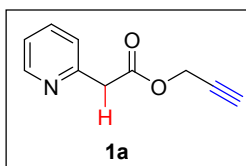

**prop-2-yn-1-yl 2-(pyridin-2-yl)acetate (1a)** Light yellow oil;  $^1\text{H}$  NMR (400 MHz,  $\text{CDCl}_3$ ):  $\delta$  8.53 (dd,  $J = 4.9, 0.8$  Hz, 1H), 7.67–7.62 (m, 1H), 7.29 (d,  $J = 7.8$  Hz, 1H), 7.22–7.07 (m, 1H), 4.71 (t,  $J = 3.9$  Hz, 2H), 3.88 (d,  $J = 5.1$  Hz, 2H), 2.54 (t,  $J = 2.5$  Hz, 1H) ppm;  $^{13}\text{C}$  NMR (100 MHz,  $\text{CDCl}_3$ ):  $\delta$  169.7, 153.8, 149.4, 136.6, 123.8, 122.2, 75.2, 52.3, 43.4 ppm; HRMS ( $m/z$ ) (ESI): calcd for  $\text{C}_{10}\text{H}_7\text{NO}_2$  176.0706 [ $\text{M}+\text{H}^+$ ]; found 176.0699.

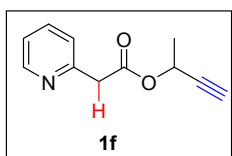

**but-3-yn-2-yl 2-(pyridin-2-yl)acetate (1e)** light yellow oil;  $^1\text{H}$  NMR (400 MHz,  $\text{CDCl}_3$ ):  $\delta$  8.39 (dd,  $J = 4.8, 0.7$  Hz, 1H), 7.50 (m, 1H), 7.15 (d,  $J = 7.8$  Hz, 1H), 7.03 (m, 1H), 5.34 (m, 1H), 3.72 (s, 2H), 2.37 (d,  $J = 2.2$  Hz, 1H), 1.35 (d,  $J = 6.7$  Hz, 3H) ppm;  $^{13}\text{C}$  NMR (100 MHz,  $\text{CDCl}_3$ ):  $\delta$  169.0, 153.6, 149.0, 136.3, 123.5, 121.8, 81.5, 73.0, 60.2, 43.2, 20.8 ppm; HRMS ( $m/z$ ) (ESI): calcd for  $\text{C}_{11}\text{H}_{12}\text{NO}_2$  190.0863 [ $\text{M}+\text{H}^+$ ]; found 190.0859.

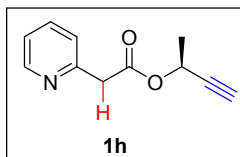

**(S)-but-3-yn-2-yl 2-(pyridin-2-yl)acetate (1f)** Light yellow oil; e.e = 99.0%;  $[\alpha]_D^{20} = -55^\circ$  ( $c = 0.3$ , MeOH);  $^1\text{H}$  NMR (400 MHz,  $\text{CDCl}_3$ ):  $\delta$  8.38 (dd,  $J = 4.8, 0.7$  Hz, 1H), 7.49 (m, 1H), 7.14 (d,  $J = 7.8$  Hz, 1H), 7.02 (m, 1H), 5.33 (qd,  $J = 6.7, 2.1$  Hz, 1H), 3.71 (s, 2H), 2.37 (d,  $J = 2.2$  Hz, 1H), 1.34 (d,  $J = 6.7$  Hz, 3H) ppm;  $^{13}\text{C}$  NMR (100 MHz,  $\text{CDCl}_3$ ):  $\delta$  169.3, 153.9, 149.3, 136.6, 123.8, 122.1, 81.8, 73.3, 60.5, 43.5, 21.1 ppm. HRMS ( $m/z$ ) (ESI): calcd for  $\text{C}_{11}\text{H}_{12}\text{NO}_2$  190.0863 [ $\text{M}+\text{H}^+$ ]; found 190.0859; RT = 21.65 min. (Chiral HPLC, CHIRALCEL OD-H -column and using 5% isopropanol mixture in hexane as eluent, Flow rate: 0.5 mL/min)

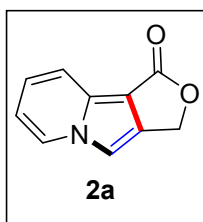

**1H,3H-furo[3,4-a]indolizin-1-one (2a)** White solid, m.p. 120-123 °C;  $^1\text{H}$  NMR (400 MHz,  $\text{CDCl}_3$ ):  $\delta$  8.09 (d,  $J = 7.0$  Hz, 1H), 7.82 (d,  $J = 8.9$  Hz, 1H), 7.16 (s, 1H), 7.12–7.10 (m, 1H), 6.83–6.82 (m, 1H), 5.30 (d,  $J = 0.8$  Hz, 2H) ppm;  $^{13}\text{C}$  NMR (100 MHz,  $\text{CDCl}_3$ ):  $\delta$

167.0, 138.8, 129.6, 126.6, 122.5, 118.4, 113.6, 104.1, 103.9, 65.8 ppm; **HRMS** ( $m/z$ ) (APCI): calcd for  $C_{10}H_7NO_2$  174.0550  $[M+H^+]$ ; found 174.0544

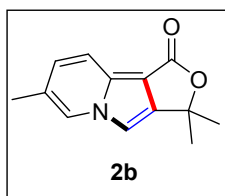

**3,3,7-trimethyl-1H,3H-furo[3,4-a]indolizin-1-one (2b)** Light yellow solid, m.p. 131-133 °C;  $^1H$  NMR (400 MHz,  $CDCl_3$ ):  $\delta$  7.79 (d,  $J = 1.1$  Hz, 1H), 7.60 (d,  $J = 9.0$  Hz, 1H), 6.97 (s, 1H), 6.87 (dd,  $J = 9.0, 1.3$  Hz, 1H), 2.23 (d,  $J = 0.6$  Hz, 1H), 1.59 (s, 2H) ppm;  $^{13}C$  NMR (100 MHz,  $CDCl_3$ ):  $\delta$  165.9, 147.4, 128.0, 125.7, 124.6, 123.2, 117.7, 103.5, 102.7, 82.0, 28.2, 18.3 ppm; **HRMS** ( $m/z$ ) (ESI): calcd for  $C_{13}H_{14}NO_2$  216.1019  $[M+H^+]$ ; found 216.1010.

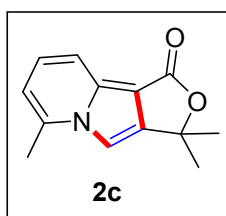

**3,3,6-trimethyl-1H,3H-furo[3,4-a]indolizin-1-one (2c)** Light yellow solid; m.p. 144-146 °C;  $^1H$  NMR (400 MHz,  $CDCl_3$ ):  $\delta$  7.70 (d,  $J = 8.9$  Hz, 1H), 7.06 (dd,  $J = 8.8, 6.9$  Hz, 1H), 7.00 (s, 1H), 6.68 (d,  $J = 6.9$  Hz, 1H), 2.57 (s, 3H), 1.67 (s, 6H) ppm;  $^{13}C$  NMR (100 MHz,  $CDCl_3$ ):  $\delta$  165.9, 147.6, 135.0, 129.8, 122.7, 115.8, 112.9, 104.2, 99.9, 82.0, 28.1, 19.1 ppm; **HRMS** ( $m/z$ ) (ESI): calcd for  $C_{13}H_{14}NO_2$  216.1019  $[M+H^+]$  found 216.1019.

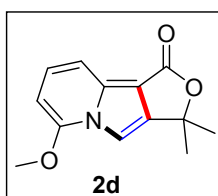

**6-methoxy-3,3-dimethyl-1H,3H-furo[3,4-a]indolizin-1-one (2d)** White solid, m.p. 142-143 °C;  $^1H$  NMR (400 MHz,  $CDCl_3$ ):  $\delta$  7.36 (d,  $J = 8.8$  Hz, 1H), 7.18 (s, 1H), 7.12-6.95 (m, 1H), 6.10 (d,  $J = 7.4$  Hz, 1H), 4.05 (s, 3H), 1.63 (s, 6H) ppm;  $^{13}C$  NMR (100 MHz,  $CDCl_3$ ):  $\delta$  166.0, 149.6, 146.9, 130.6, 124.4, 110.3, 103.8, 98.3, 89.4, 82.0, 56.5, 28.2 ppm; **HRMS** ( $m/z$ ) (ESI): calcd for  $C_{13}H_{14}NO_3$  232.0974.  $[M+H^+]$ ; found 232.0974.

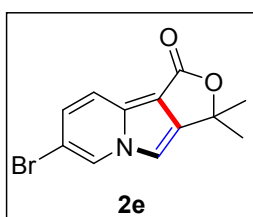

**7-bromo-3,3-dimethyl-1H,3H-furo[3,4-a]indolizin-1-one (2e)** White solid, m.p. 180-183 °C;  $^1H$  NMR (400 MHz,  $CDCl_3$ ):  $\delta$  8.23 (s, 1H), 7.62 (d,  $J = 9.4$  Hz, 1H), 7.15 (s, 1H), 7.08 (dd,  $J = 9.4, 1.6$  Hz, 1H), 1.63 (s, 6H) ppm;  $^{13}C$  NMR (100 MHz,  $CDCl_3$ ):



$\delta$  165.4, 148.0, 127.2, 126.8, 125.7, 118.7, 108.1, 105.1, 103.8, 82.3, 28.1 ppm;  
**HRMS** ( $m/z$ ) (ESI): calcd for  $C_{12}H_{11}BrNO_2$  279.9968 281.9947 [ $M+H^+$ ]; found  
279.9968 281.9949.

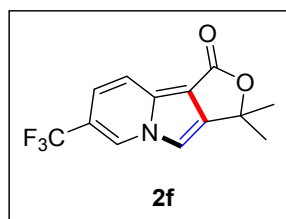

**3,3-dimethyl-7-(trifluoromethyl)-1H,3H-furo[3,4-a]indolizin-1-one (2f)** Light yellow solid; m.p. 152-155 °C;  $^1H$  NMR (400 MHz,  $CDCl_3$ )  $\delta$  8.48 (s, 1H), 7.84 (d,  $J = 9.3$  Hz, 1H), 7.33 (s, 1H), 7.18 (d,  $J = 9.3$  Hz, 1H), 1.67 (s, 6H) ppm;  $^{13}C$  NMR (100 MHz,  $CDCl_3$ )  $\delta$  165.2, 148.6, 128.6, 125.7 (q,  $J = 3.9$  Hz), 123.3 (q,  $J = 270.0$  Hz), 118.8, 117.9, 117.5 (q,  $J = 35.5$  Hz), 105.9, 105.2, 82.4, 27.9 ppm.  
**HRMS** ( $m/z$ ) (APCI): calcd for  $C_{13}H_{11}F_3NO_2$  270.0736 [ $M+H^+$ ]; found 270.0735.

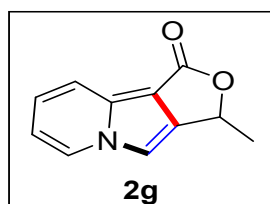

**3-methyl-1H,3H-furo[3,4-a]indolizin-1-one (2g)** White solid, m.p. 136-137 °C;  $^1H$  NMR (400 MHz,  $CDCl_3$ ):  $\delta$  8.09–8.07 (m, 1H), 7.76 (d,  $J = 8.9$  Hz, 1H), 7.13 (s, 1H), 7.07–7.05 (m, 1H), 6.80–6.79 (m, 1H), 5.60–5.54 (m, 1H), 1.60 (d,  $J = 6.6$  Hz, 3H) ppm;  $^{13}C$  NMR (100 MHz,  $CDCl_3$ ):  $\delta$  166.5, 143.7, 129.3, 126.8, 122.6, 118.4, 113.6, 104.0, 103.9, 74.2, 21.5 ppm; **HRMS** ( $m/z$ ) (ESI): calcd for  $C_{11}H_{10}NO_2$  188.0712 [ $M+H^+$ ]; found 188.0706.

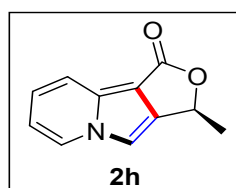

**(S)-3-methyl-1H,3H-furo[3,4-a]indolizin-1-one (2h)** Light yellow oil; e.e = 99.0%;  $[\alpha]^{20}D = -55^\circ$  (c = 0.3, MeOH);  $^1H$  NMR (400 MHz,  $CDCl_3$ ):  $\delta$  8.38 (dd,  $J = 4.8, 0.7$  Hz, 1H), 7.49 (m, 1H), 7.14 (d,  $J = 7.8$  Hz, 1H), 7.02 (m, 1H), 5.33 (m, 1H), 3.71 (s, 2H), 2.37 (d,  $J = 2.2$  Hz, 1H), 1.34 (d,  $J = 6.7$  Hz, 3H) ppm;  $^{13}C$  NMR (100 MHz,  $CDCl_3$ ):  $\delta$  169.3, 153.9, 149.3, 136.6, 123.8, 122.1, 81.8, 73.3, 60.5, 43.5, 21.1 ppm. **HRMS** ( $m/z$ ) (ESI): calcd for  $C_{11}H_{12}NO_2$  190.0863 [ $M+H^+$ ]; found 190.0859; RT = 21.65 min. (Chiral HPLC, CHIRALCEL OD-H -column and using 5% isopropanol mixture in hexane as eluent, Flow rate: 0.5 mL/min)

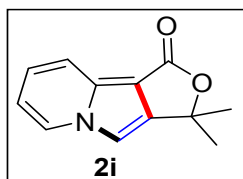

**3,3-dimethyl-1H,3H-furo[3,4-a]indolizin-1-one (2i)** Light yellow solid, m.p. 121-123 °C;  $^1\text{H NMR}$  (400 MHz,  $\text{CDCl}_3$ ):  $\delta$  8.09 (d,  $J = 7.0$  Hz, 1H), 7.70 (d,  $J = 8.9$  Hz, 1H), 7.15 (s, 1H), 7.05–7.01 (m, 1H), 6.78–6.76 (m, 1H), 1.62 (s, 6H) ppm;  $^{13}\text{C NMR}$  (100 MHz,  $\text{CDCl}_3$ ):  $\delta$  165.9, 147.3, 129.2, 127.0, 122.7, 118.2, 113.5, 103.7, 103.3, 82.1, 28.1 ppm; **HRMS** ( $m/z$ ) (APCI): calcd for  $\text{C}_{12}\text{H}_{12}\text{NO}_2$  202.0868 [ $\text{M}+\text{H}^+$ ]; found 202.0856.

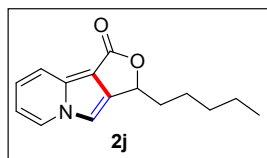

**3-pentyl-1H,3H-furo[3,4-a]indolizin-1-one (2j)** Light yellow oil;  $^1\text{H NMR}$  (400 MHz,  $\text{CDCl}_3$ ):  $\delta$  8.08 (dt,  $J = 7.0, 1.0$  Hz, 1H), 7.78 (d,  $J = 8.9$  Hz, 1H), 7.13 (s, 1H), 7.10–7.04 (m, 1H), 6.82–6.79 (m, 1H), 5.44 (t,  $J = 6.6$  Hz, 1H), 1.97–1.73 (m, 2H), 1.48 (ddd,  $J = 13.1, 7.7, 4.0$  Hz, 2H), 1.37–1.24 (m, 5H), 0.90–0.82 (m, 4H) ppm;  $^{13}\text{C NMR}$  (100 MHz,  $\text{CDCl}_3$ ):  $\delta$  166.7, 142.5, 129.3, 126.7, 122.5, 118.4, 113.5, 104.4, 104.1, 78.0, 35.2, 31.51 (s), 24.4, 22.5, 14.0, 13.9 ppm; **HRMS** ( $m/z$ ) (ESI): calcd for  $\text{C}_{15}\text{H}_{18}\text{NO}_2$  244.1338 [ $\text{M}+\text{H}^+$ ]; found 244.1333.

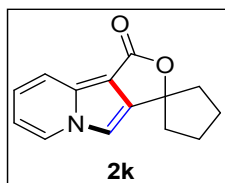

**1'H-spiro[cyclopentane-1,3'-furo[3,4-a]indolizin]-1'-one (2k)** White solid, m.p. 126-128 °C;  $^1\text{H NMR}$  (500 MHz,  $\text{CDCl}_3$ ):  $\delta$  8.06 (d,  $J = 6.9$  Hz, 1H), 7.76 (d,  $J = 8.9$  Hz, 1H), 7.11 (s, 1H), 7.09–7.04 (m, 1H), 6.78 (dd,  $J = 9.8, 3.9$  Hz, 1H), 2.20 (dd,  $J = 10.7, 4.3$  Hz, 2H), 2.08–1.97 (m, 4H), 1.95–1.78 (m, 2H) ppm;  $^{13}\text{C NMR}$  (125 MHz,  $\text{CDCl}_3$ ):  $\delta$  166.0, 145.3, 129.2, 126.7, 122.5, 118.4, 113.4, 104.7, 103.0, 91.8, 77.3, 77.1, 76.8, 39.9, 24.4 ppm; **HRMS** ( $m/z$ ) (APCI): calcd for  $\text{C}_{14}\text{H}_{14}\text{NO}_2$  228.1025 [ $\text{M}+\text{H}^+$ ]; found 228.1009.

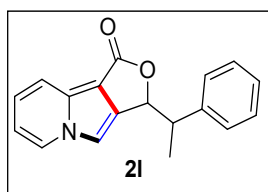

**3-(1-phenylethyl)-1H,3H-furo[3,4-a]indolizin-1-one (2l)** White solid, m.p. 142-144 °C;  $^1\text{H NMR}$  (400 MHz,  $\text{CDCl}_3$ ):  $\delta$  7.80 (d,  $J = 7.0$  Hz, 1H), 7.67 (d,  $J = 8.9$  Hz, 1H), 7.31–7.13 (m,

6H), 7.03–6.88 (m, 1H), 6.67 (m, 1H), 6.14 (s, 1H), 5.41 (d,  $J = 8.9$  Hz, 1H), 2.86 (m, 1H), 1.46 (d,  $J = 6.9$  Hz, 3H) ppm;  $^{13}\text{C}$  NMR (100 MHz,  $\text{CDCl}_3$ ):  $\delta$  165.40, 140.79, 139.98, 128.08, 127.5, 127.1, 127.0, 126.2, 125.5, 121.4, 117.3, 112.4, 103.9, 103.3, 80.7, 44.4, 17.7 ppm; HRMS ( $m/z$ ) (ESI): calcd for  $\text{C}_{18}\text{H}_{16}\text{NO}_2$  278.1181 [ $\text{M}+\text{H}^+$ ]; found 278.1174.

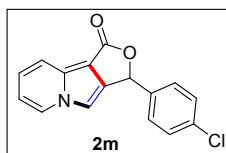

**3-(4-chlorophenyl)-1H,3H-furo[3,4-a]indolizin-1-one (2m)**

White solid, m.p. 155-157 °C;  $^1\text{H}$  NMR (400 MHz,  $\text{CDCl}_3$ ):  $\delta$  8.08–8.06 (m, 1H), 7.89–7.80 (m, 1H), 7.32 (s, 4H), 7.17–7.10 (m, 2H), 6.85–6.84 (m, 1H), 6.42 (d,  $J = 1.0$  Hz, 1H) ppm;  $^{13}\text{C}$  NMR (100 MHz,  $\text{CDCl}_3$ ):  $\delta$  165.9, 141.6, 136.3, 134.8, 129.5, 129.0, 128.2, 126.9, 123.1, 118.60, 113.9, 104.8, 103.9, 77.9 ppm; HRMS ( $m/z$ ) (APCI): calcd for  $\text{C}_{16}\text{H}_{11}\text{ClNO}_2$  284.0478 [ $\text{M}+\text{H}^+$ ]; found 284.0461.

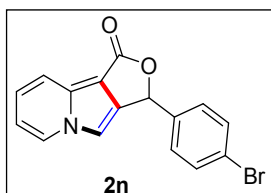

**3-(4-bromophenyl)-1H, 3H-furo[3,4-a]indolizin-1-one (2n)**

White solid, m.p. 116-117 °C;  $^1\text{H}$  NMR (400 MHz,  $\text{CDCl}_3$ ):  $\delta$  8.00–7.99 (m, 1H), 7.79 (d,  $J = 9.0$  Hz, 1H), 7.49–7.36 (m, 2H), 7.25–7.14 (m, 2H), 7.12–7.00 (m, 2H), 6.79–6.78 (m, 1H), 6.35 (s, 1H) ppm;  $^{13}\text{C}$  NMR (100 MHz,  $\text{CDCl}_3$ ):  $\delta$  164.8, 140.5, 135.8, 130.9, 128.6, 128.5, 127.4, 125.8, 122.0, 121.9, 117.6, 112.9, 103.7, 102.8, 76.9 ppm; HRMS ( $m/z$ ) (ESI): calcd for  $\text{C}_{16}\text{H}_{11}\text{BrNO}_2$  327.9968 329.9947 [ $\text{M}+\text{H}^+$ ]; found 327.9967 327.9900.

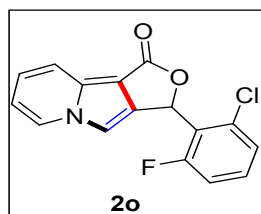

**3-(2-chloro-6-fluorophenyl)-1H,3H-furo[3,4-a]indolizin-1-**

**one (2o)** White solid, m.p. 163-165 °C;  $^1\text{H}$  NMR (400 MHz,  $\text{CDCl}_3$ ):  $\delta$  8.05–8.04 (m, 1H), 7.90–7.84 (m, 1H), 7.30–7.27 (m, 1H), 7.25–7.21 (m, 1H), 7.17–7.09 (m, 2H), 7.02–6.91 (m, 2H), 6.84 (m, 1H) ppm;  $^{13}\text{C}$  NMR (100 MHz,  $\text{CDCl}_3$ ):  $\delta$  166.2, 162.0 (d,  $^1J_{\text{C-F}} = 253.0$  Hz), 140.6, 134.7, 130.8 (d,  $^3J_{\text{C-F}} = 10.0$  Hz), 129.5, 126.8, 125.9 (d,  $^4J_{\text{C-F}} = 3.6$  Hz), 123.0, 122.8, 118.7, 115.2 (d,  $^2J_{\text{C-F}} = 22.1$  Hz), 113.7, 104.5, 72.3 ppm; HRMS ( $m/z$ ) (ESI): calcd for  $\text{C}_{16}\text{H}_{10}\text{ClFNO}_2$  302.0384 [ $\text{M}+\text{H}^+$ ]; found 302.0378.

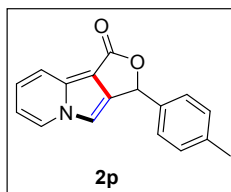

**3-(p-tolyl)-1H,3H-furo[3,4-a]indolizin-1-one (2p)** White solid, m.p. 113-115 °C;  $^1\text{H NMR}$  (400 MHz,  $\text{CDCl}_3$ ):  $\delta$  8.05 (d,  $J = 6.9$  Hz, 1H), 7.85 (d,  $J = 8.9$  Hz, 1H), 7.34–7.21 (m, 2H), 7.13 (dd,  $J = 19.9, 6.8$  Hz, 4H), 6.83 (t,  $J = 6.9$  Hz, 1H), 6.43 (s, 1H), 2.34 (s, 3H) ppm;  $^{13}\text{C NMR}$  (100 MHz,  $\text{CDCl}_3$ ):  $\delta$  166.3, 142.1, 138.9, 134.7, 129.4, 129.4, 126.8, 122.8, 118.6, 113.7, 104.8, 104.2, 78.8, 21.2 ppm; **HRMS** ( $m/z$ ) (APCI): calcd for  $\text{C}_{17}\text{H}_{14}\text{NO}_2$  264.1025 [ $\text{M}+\text{H}^+$ ]; found 264.1007.

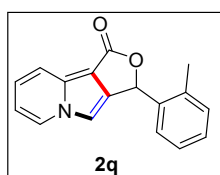

**3-(o-tolyl)-1H,3H-furo[3,4-a]indolizin-1-one (2q)** White solid, m.p. 117-119 °C;  $^1\text{H NMR}$  (400 MHz,  $\text{CDCl}_3$ ):  $\delta$  8.07–8.05 (m, 1H), 7.86 (d,  $J = 8.9$  Hz, 1H), 7.24 (dd,  $J = 12.2, 7.6$  Hz, 3H), 7.14–7.11 (m, 3H), 6.89–6.80 (m, 1H), 6.70 (s, 1H), 2.54 (s, 3H) ppm;  $^{13}\text{C NMR}$  (100 MHz,  $\text{CDCl}_3$ ):  $\delta$  166.3, 141.5, 136.4, 135.5, 130.8, 129.5, 128.9, 126.7, 126.3, 126.3, 122.8, 118.6, 113.8, 104.9, 104.5, 19.2 ppm; **HRMS** ( $m/z$ ) (ESI): calcd for  $\text{C}_{17}\text{H}_{14}\text{NO}_2$  264.1025 [ $\text{M}+\text{H}^+$ ]; found 264.1020.

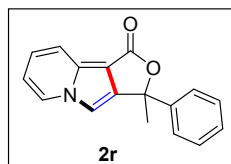

**3-methyl-3-phenyl-1H,3H-furo[3,4-a]indolizin-1-one (2r)** Light yellow solid, m.p. 124-126 °C;  $^1\text{H NMR}$  (400 MHz,  $\text{CDCl}_3$ ):  $\delta$  7.99 (d,  $J = 6.9$  Hz, 1H), 7.72 (d,  $J = 8.9$  Hz, 1H), 7.50 (d,  $J = 8.0$  Hz, 2H), 7.27 (t,  $J = 7.6$  Hz, 2H), 7.20 (d,  $J = 10.2$  Hz, 2H), 7.02 (dd,  $J = 8.3, 7.4$  Hz, 1H), 6.73 (t,  $J = 6.9$  Hz, 1H), 1.92 (s, 3H) ppm;  $^{13}\text{C NMR}$  (100 MHz,  $\text{CDCl}_3$ ):  $\delta$  164.5, 145.3, 141.1, 128.3, 127.5, 126.9, 125.8, 123.9, 121.9, 117.5, 112.7, 103.1, 102.6, 83.7, 28.7 ppm; **HRMS** ( $m/z$ ) (ESI): calcd for  $\text{C}_{16}\text{H}_{11}\text{N}_3\text{O}$  286.0844 [ $\text{M}+\text{Na}^+$ ]; found 286.0839.

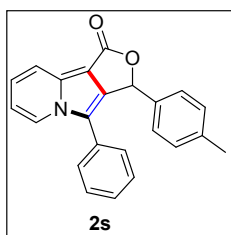

**4-phenyl-3-(p-tolyl)-1H,3H-furo[3,4-a]indolizin-1-one (2s)** Light yellow solid, m.p. 154-156 °C;  $^1\text{H NMR}$  (400 MHz,  $\text{CDCl}_3$ ):  $\delta$  8.28 (d,  $J = 7.2$  Hz, 1H), 7.96–7.93 (m, 1H), 7.41–7.29 (m, 3H), 7.20–7.11 (m, 5H), 7.07 (d,  $J = 8.0$  Hz, 2H), 6.82 (td,  $J = 7.0, 1.3$  Hz, 1H), 6.44 (s, 1H), 2.31 (s, 3H) ppm;  $^{13}\text{C NMR}$  (100 MHz,

CDCl<sub>3</sub>):  $\delta$  166.5, 140.6, 138.8, 134.6, 129.3, 129.2, 129.2, 129.2, 128.9, 128.4, 127.3, 124.1, 122.8, 118.9, 117.6, 113.8, 104.4, 79.5, 21.3 ppm; **HRMS** ( $m/z$ ) (ESI): calcd for C<sub>23</sub>H<sub>18</sub>NO<sub>2</sub> 340.1338 [M+H<sup>+</sup>]; found 340.1332.

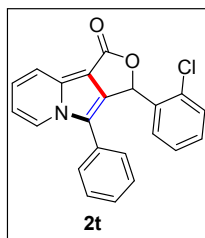

**3-(2-chlorophenyl)-4-phenyl-1H,3H-furo[3,4-a]indolizin-1-one**

**(2t)** White solid, m.p. 181-183 °C; **<sup>1</sup>H NMR** (400 MHz, CDCl<sub>3</sub>):  $\delta$  8.24 (d,  $J$  = 7.1 Hz, 1H), 7.93 (d,  $J$  = 8.9 Hz, 1H), 7.38–7.28 (m, 4H), 7.23–7.12 (m, 6H), 6.95 (d,  $J$  = 4.9 Hz, 1H), 6.83 (td,  $J$  = 7.0, 1.2 Hz, 1H) ppm; **<sup>13</sup>C NMR** (100 MHz, CDCl<sub>3</sub>):  $\delta$  166.3, 139.9,

134.8, 133.8, 130.2, 129.7, 129.4, 129.2, 129.0, 128.8, 128.6, 127.1, 124.3, 123.0, 118.7, 117.7, 114.0, 104.2, 75.8 ppm; **HRMS** ( $m/z$ ) (APCI): calcd for C<sub>22</sub>H<sub>15</sub>NO<sub>2</sub> 360.0791 [M+H<sup>+</sup>]; found 360.0769.

# Copies of $^1\text{H}$ NMR and $^{13}\text{C}$ NMR Spectra of all compounds

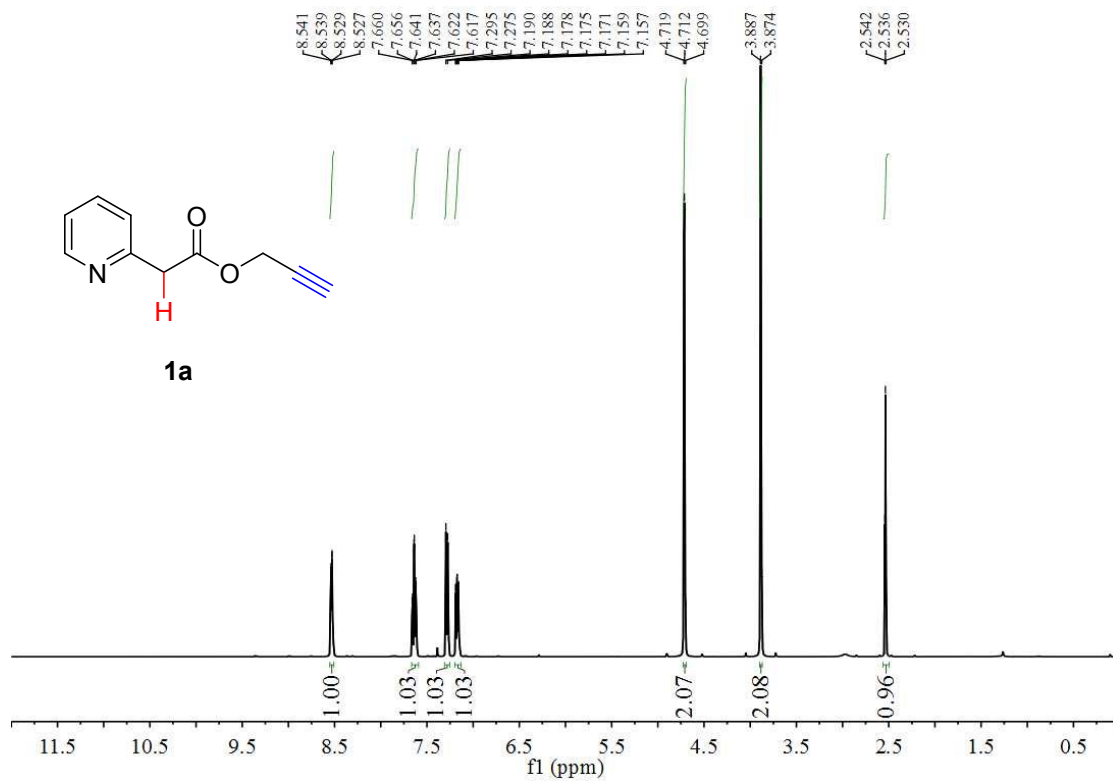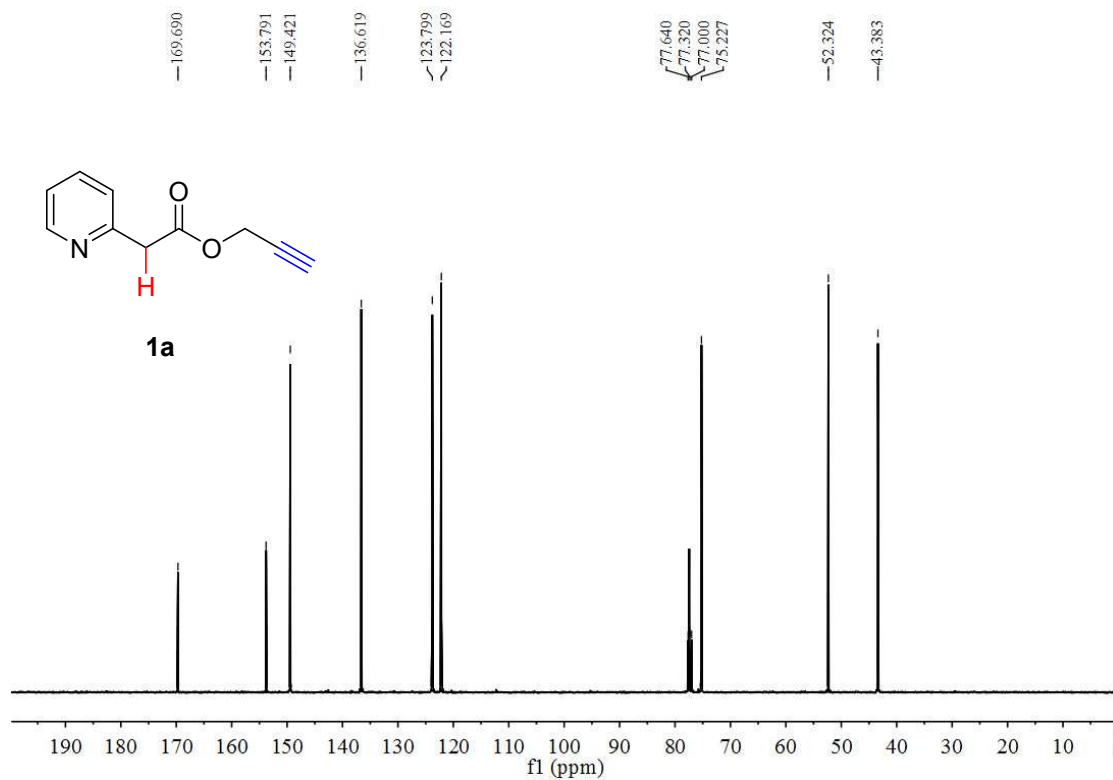

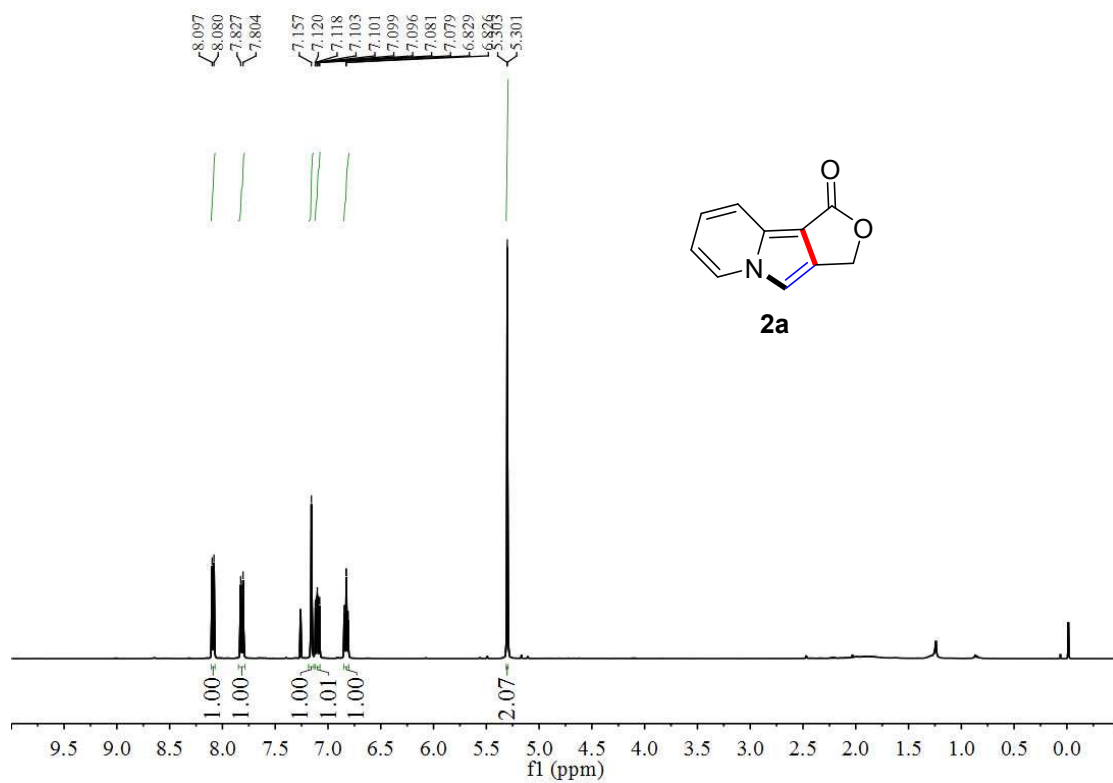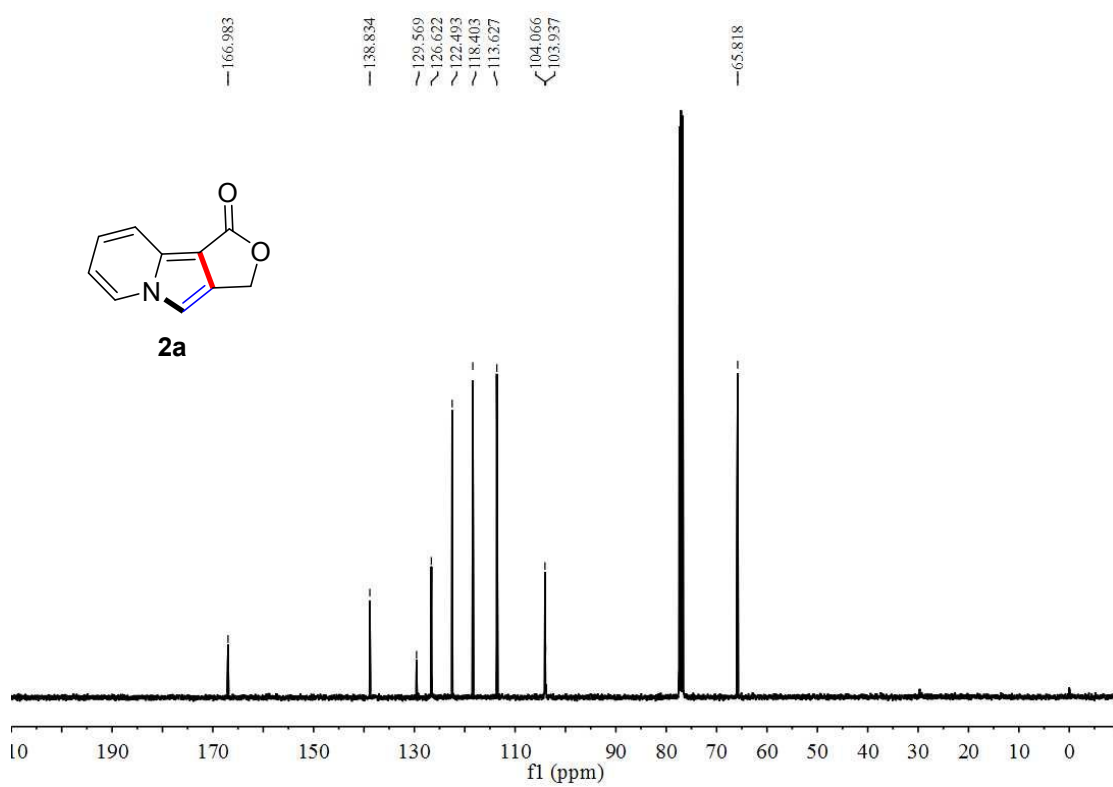

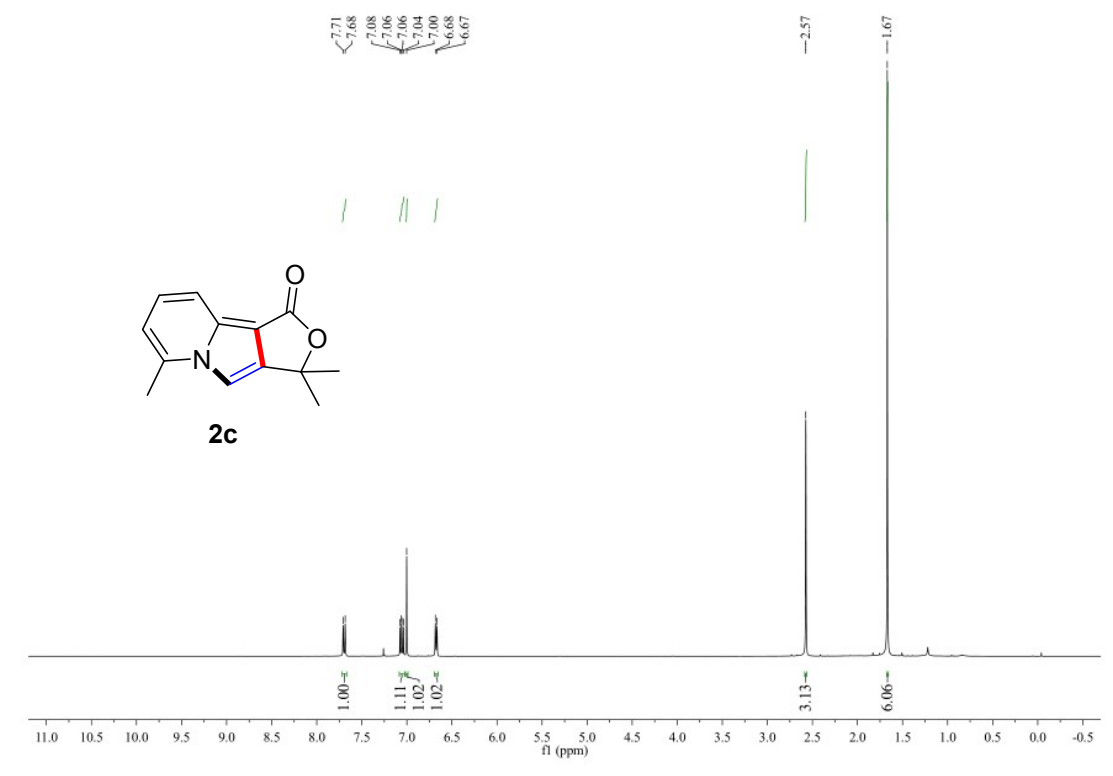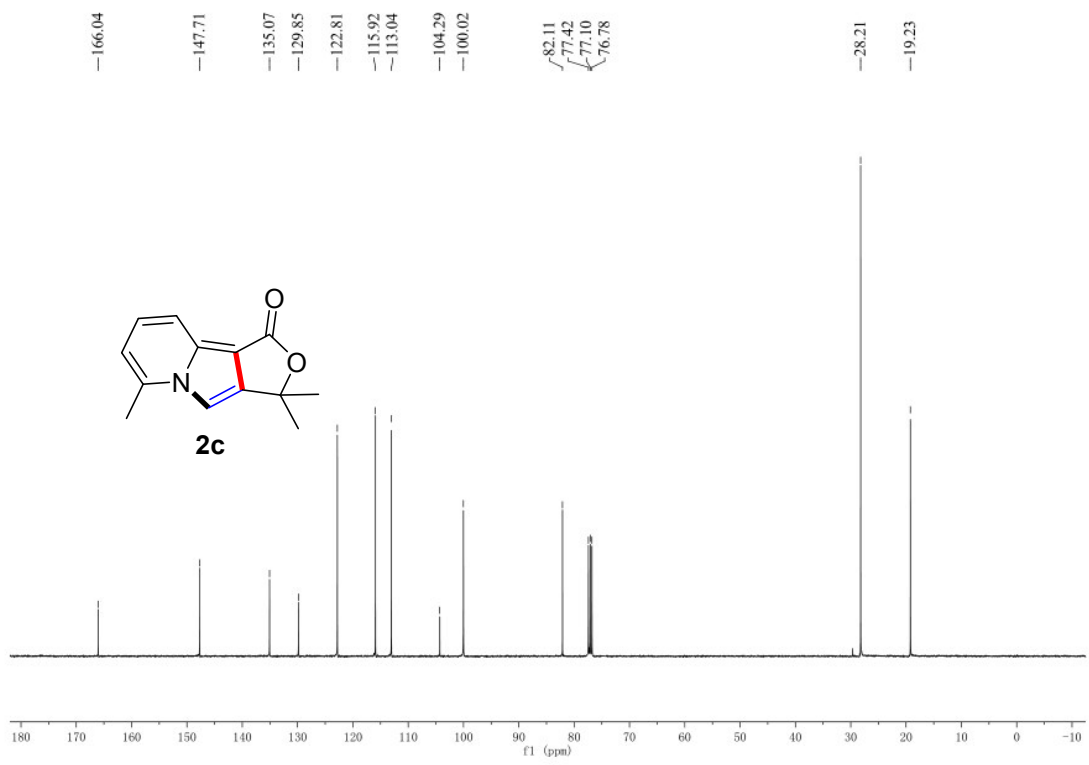



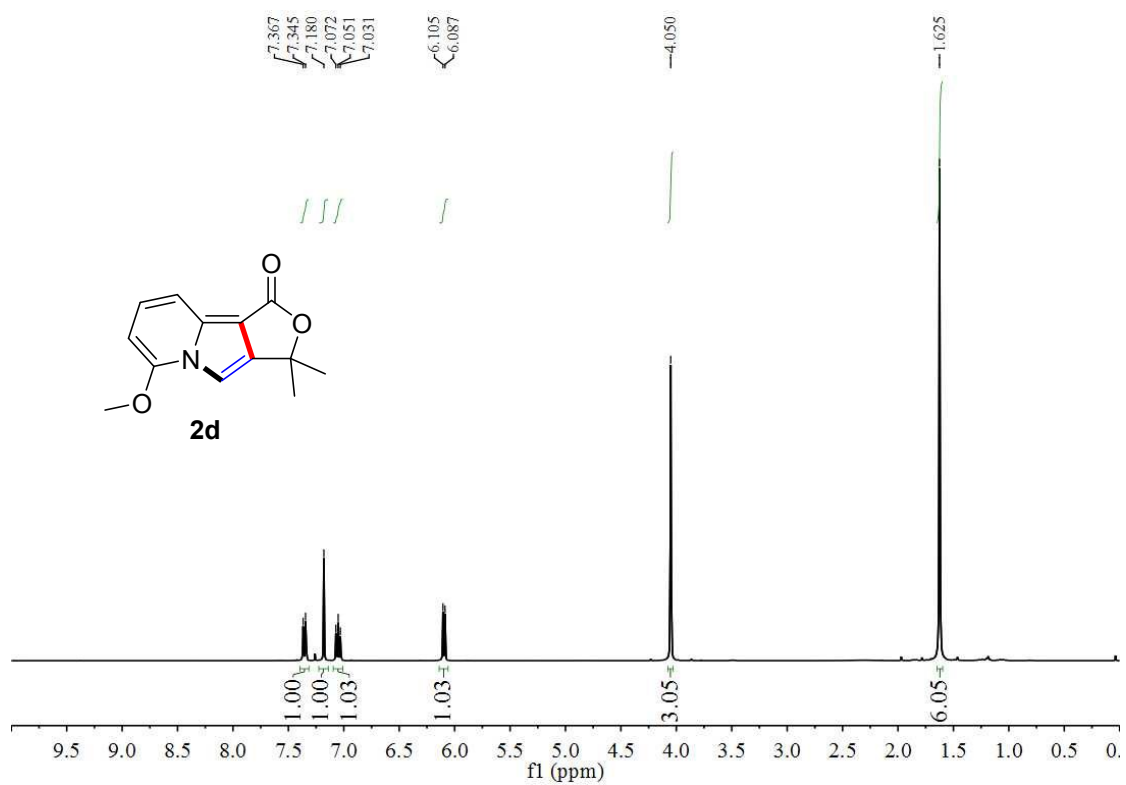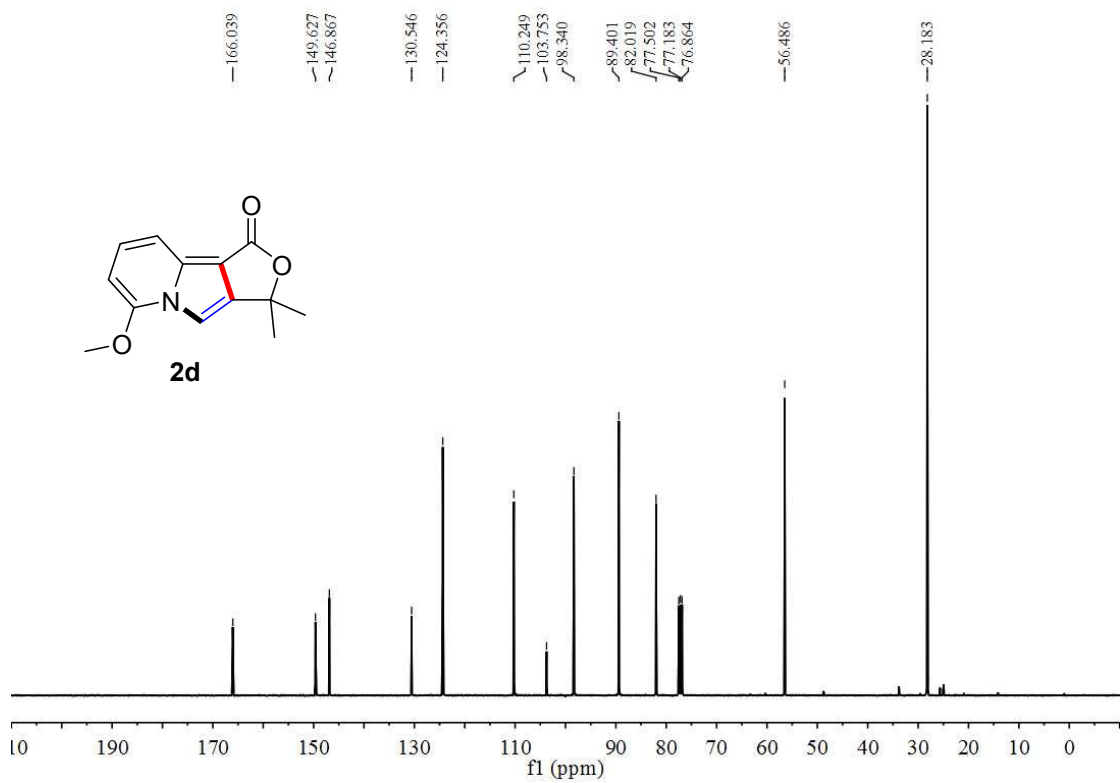

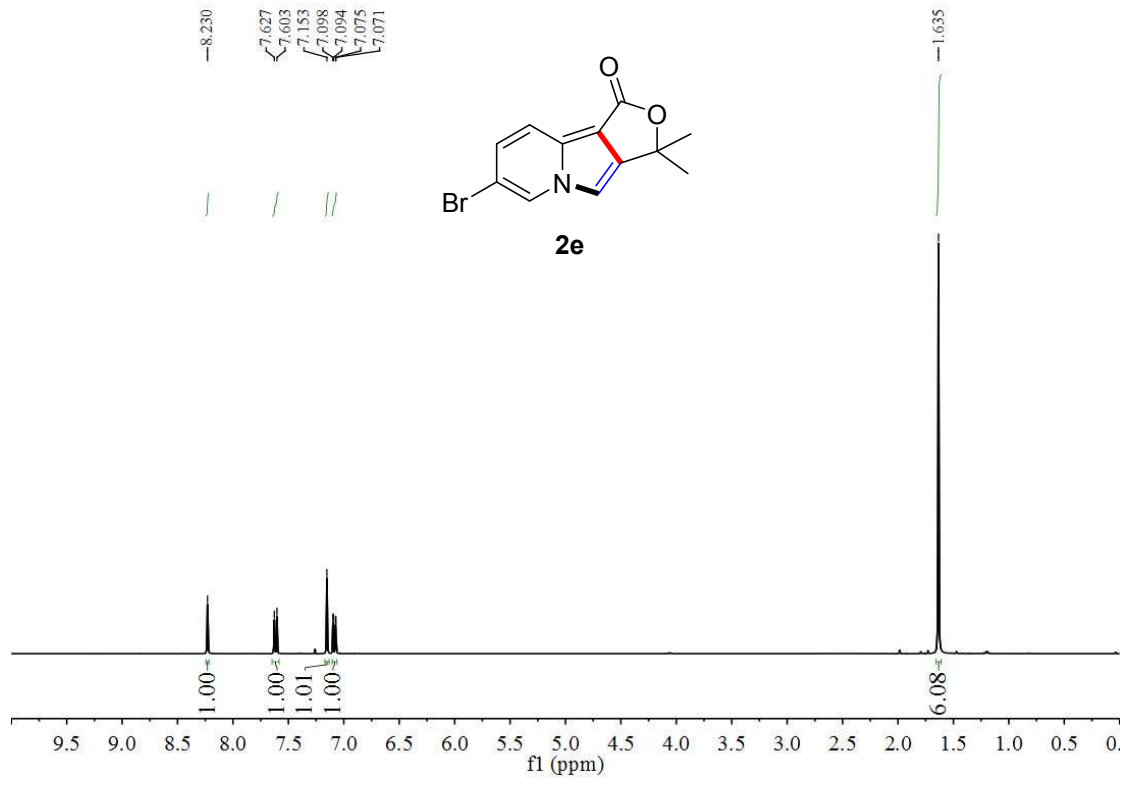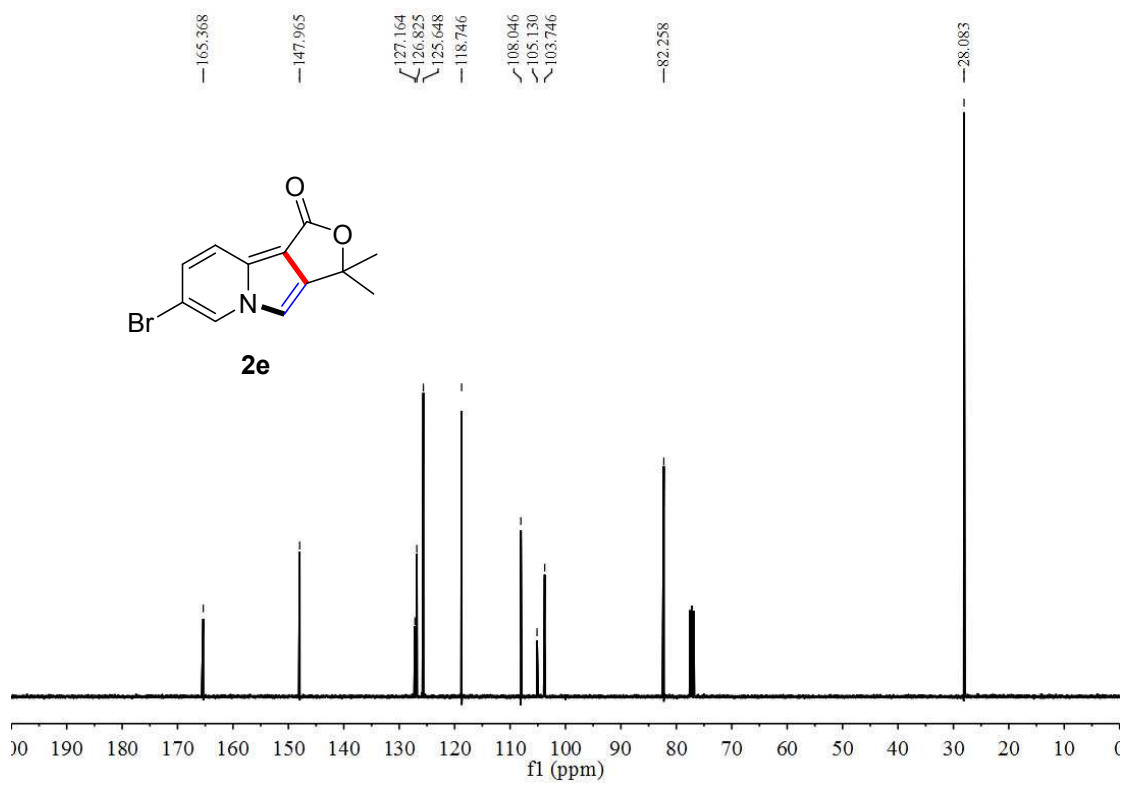

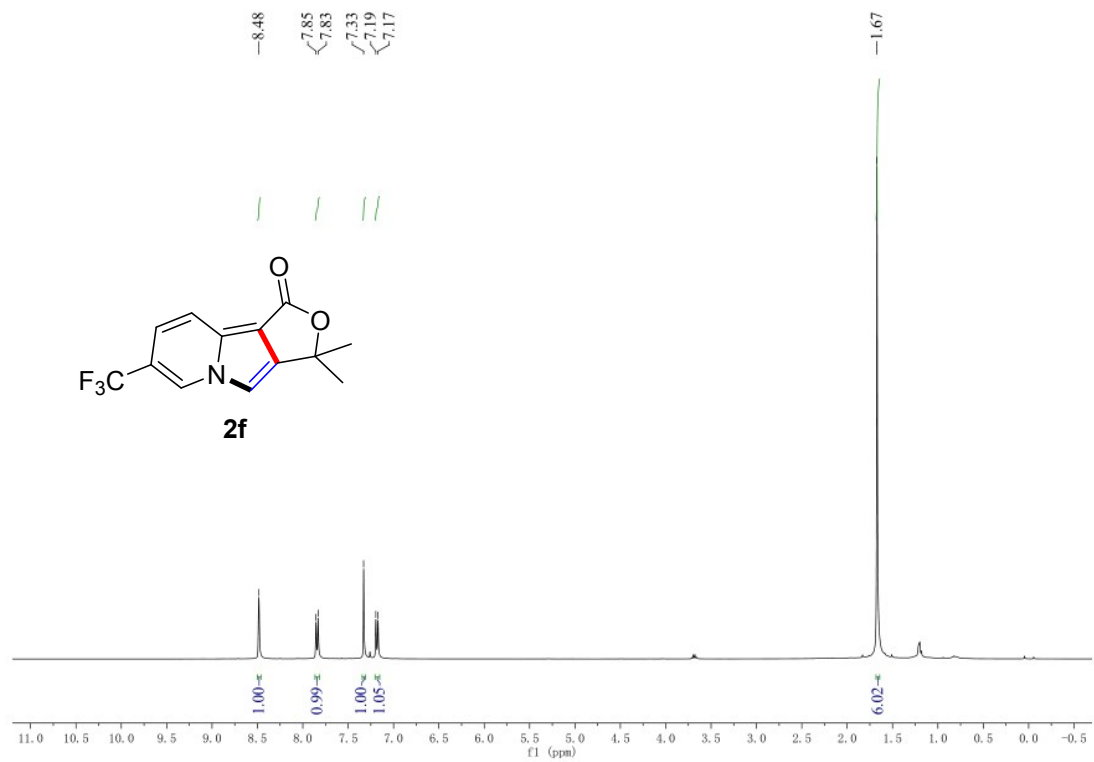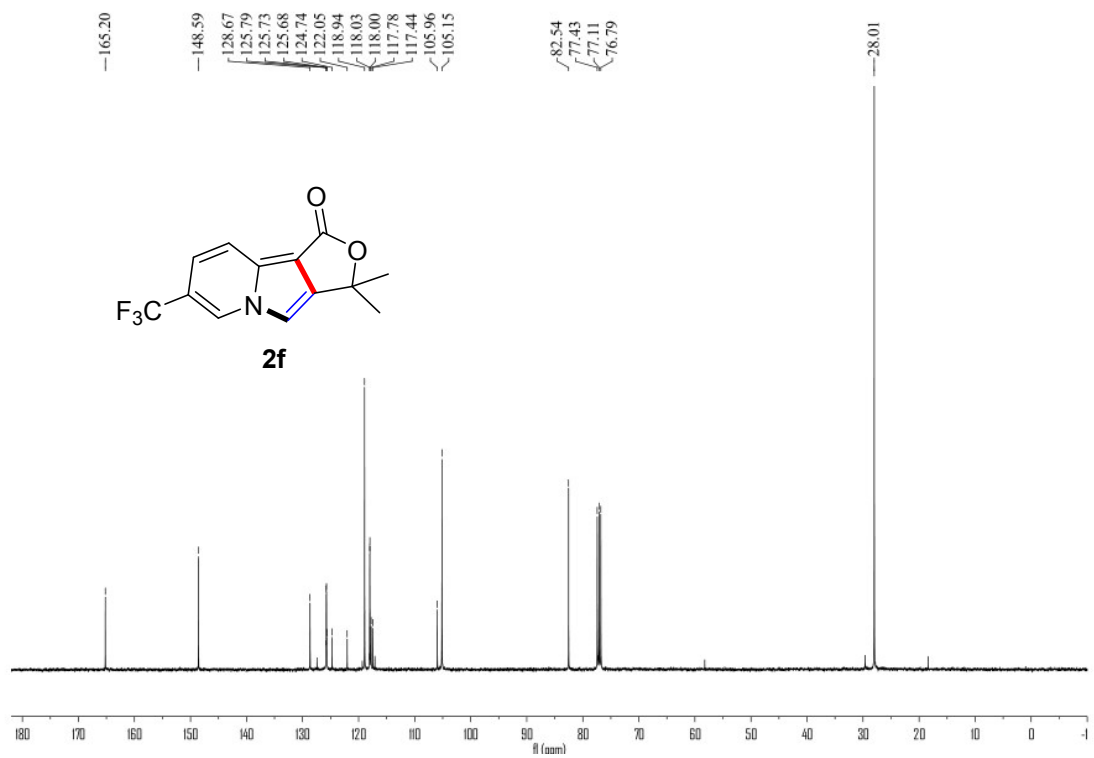

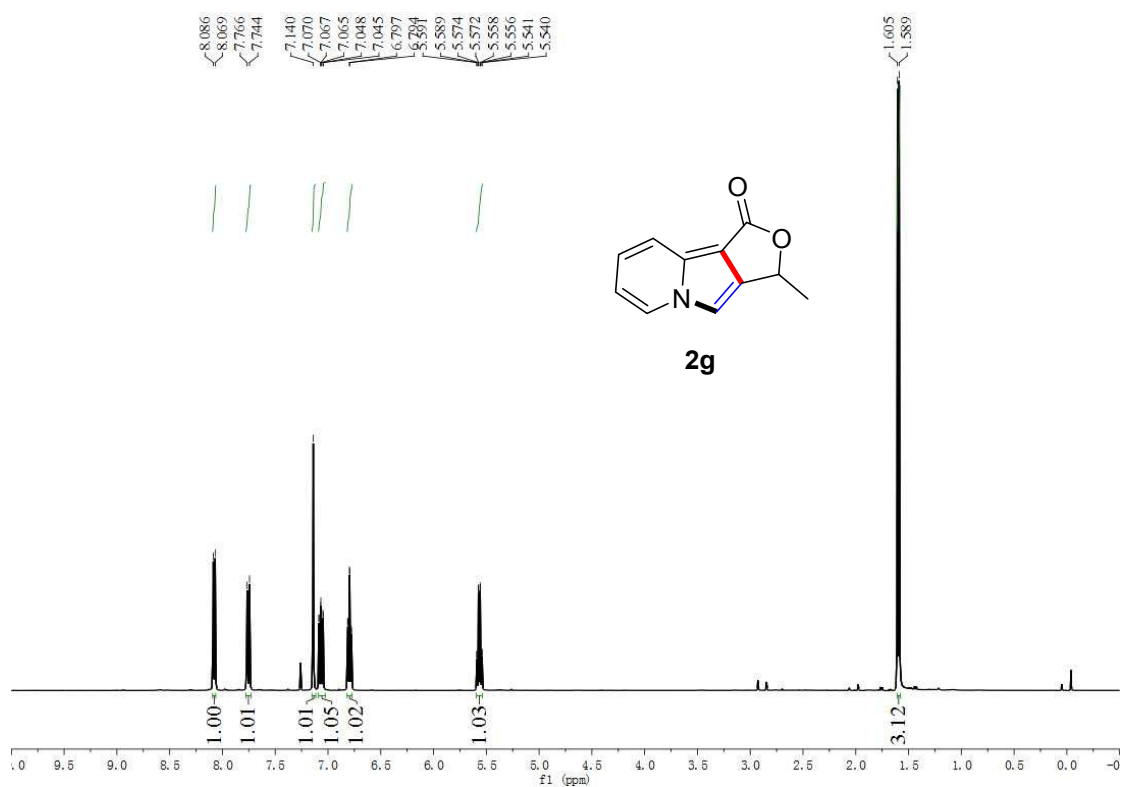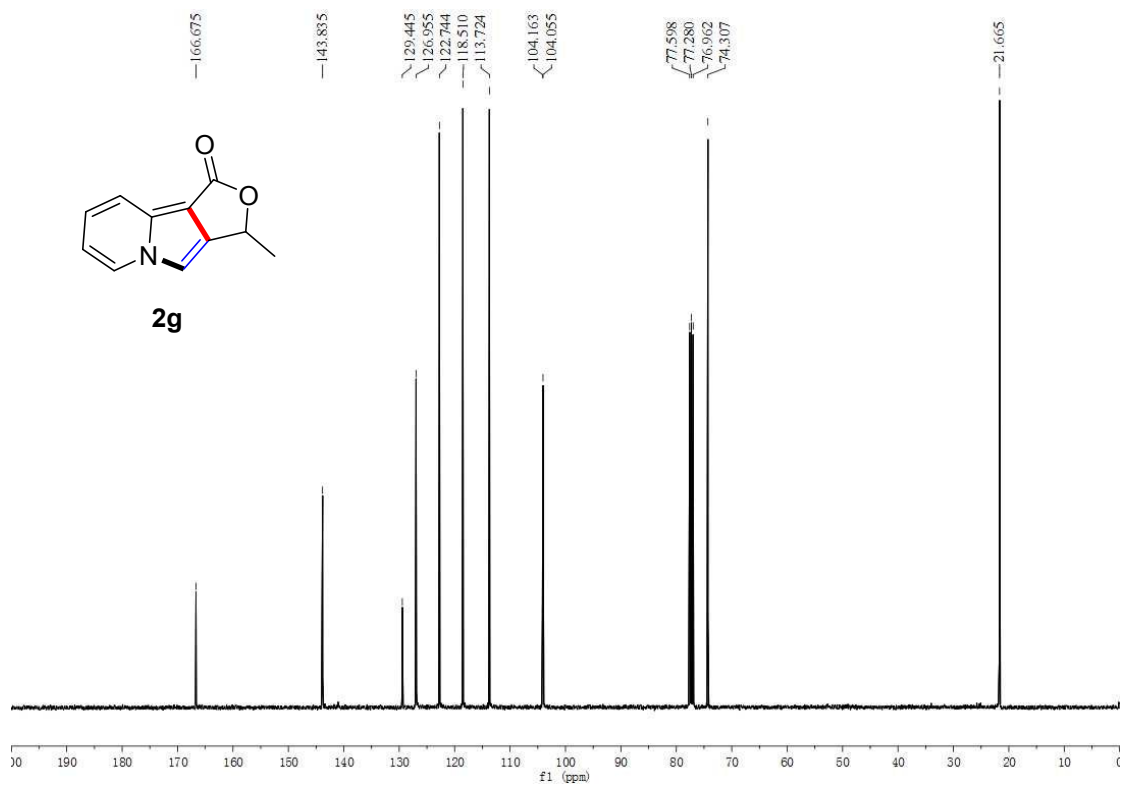

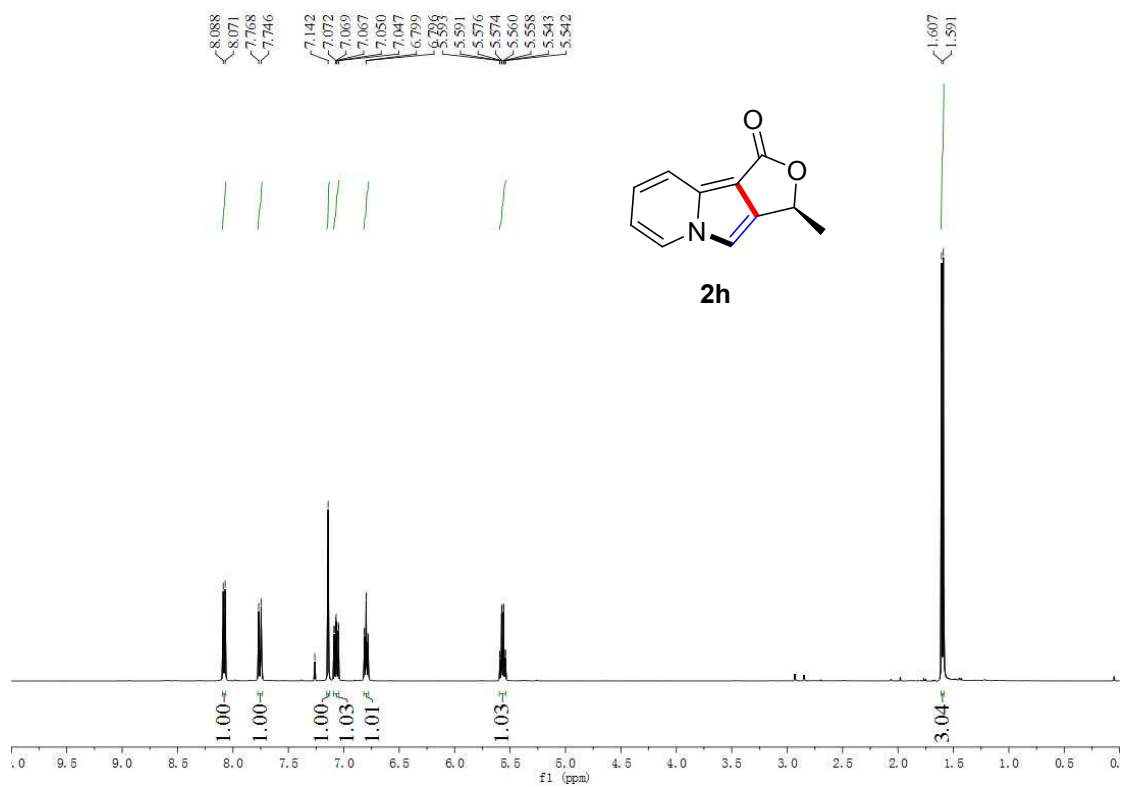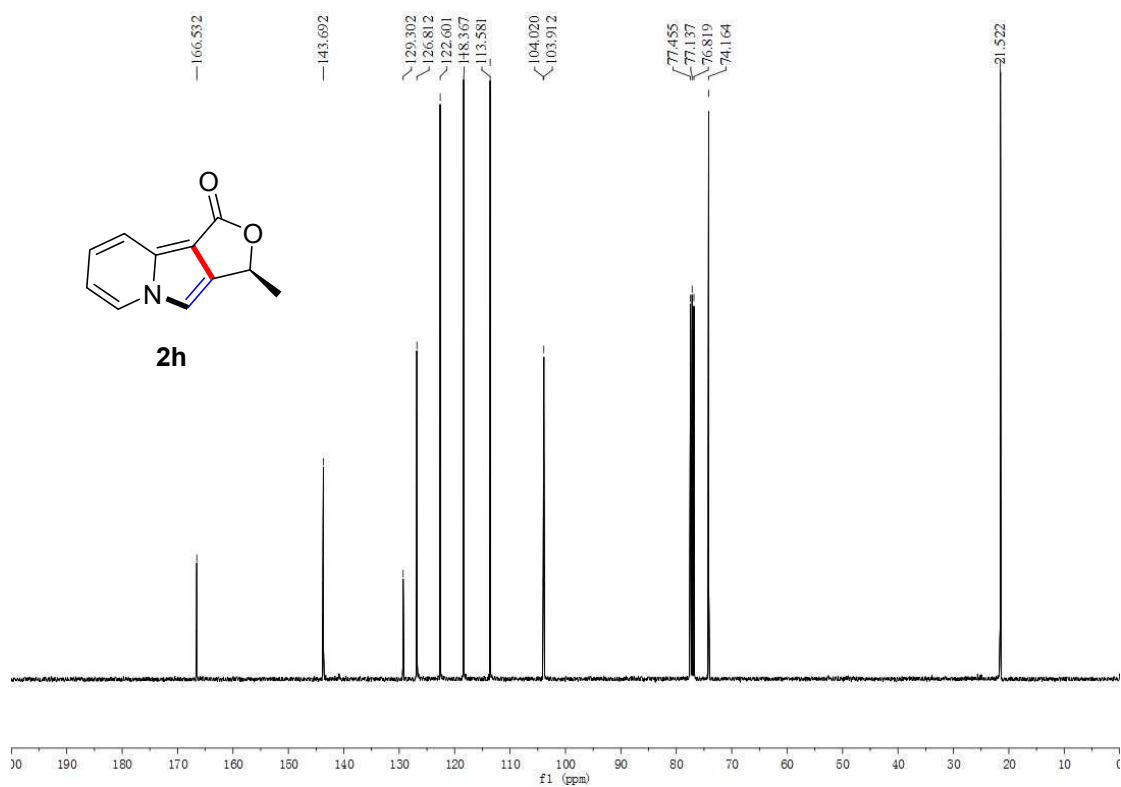

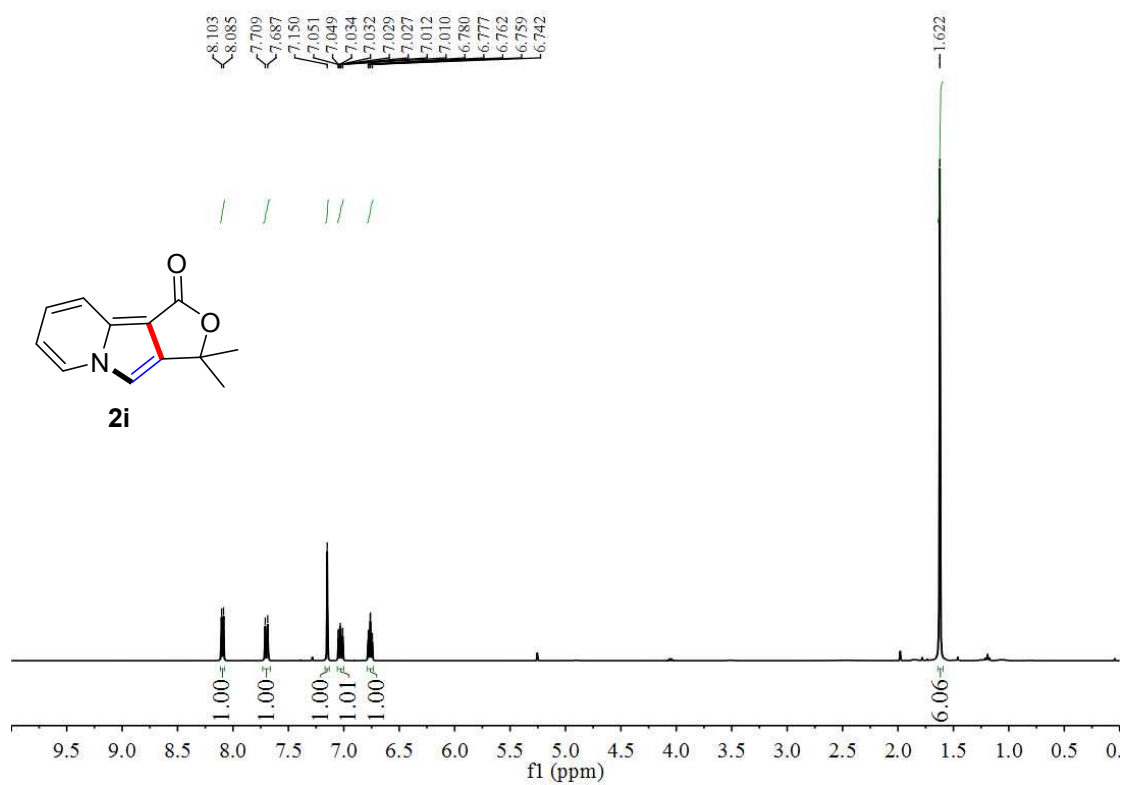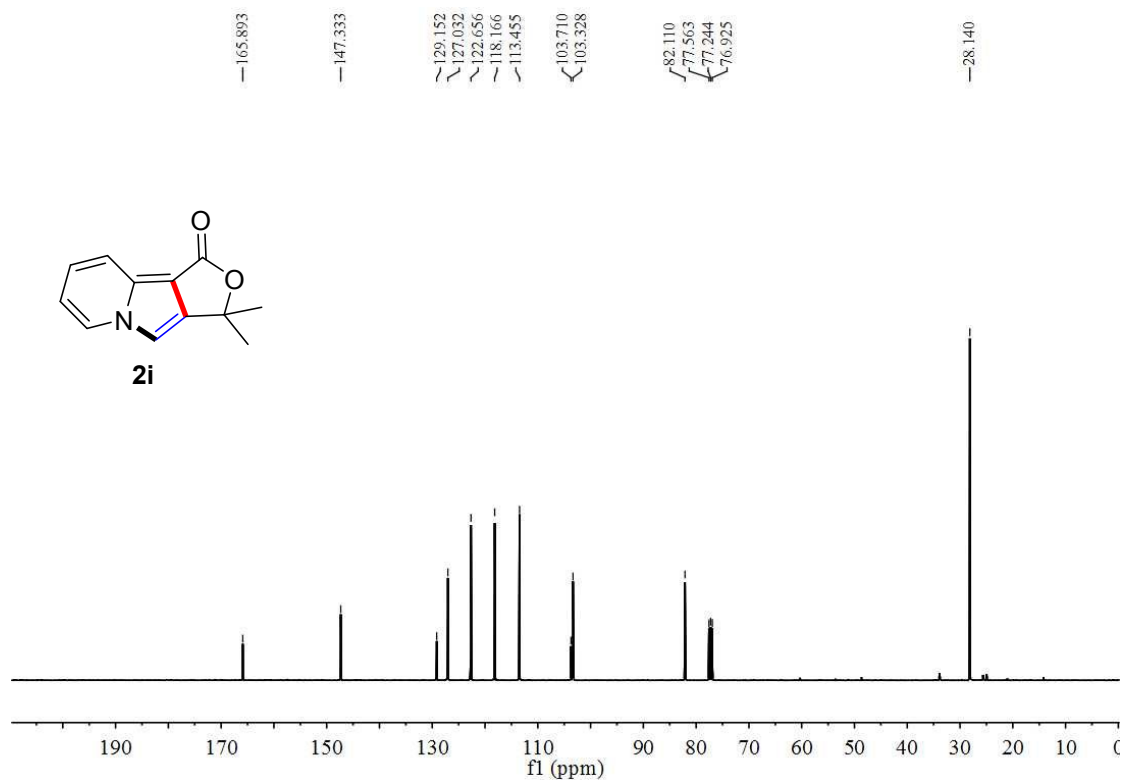

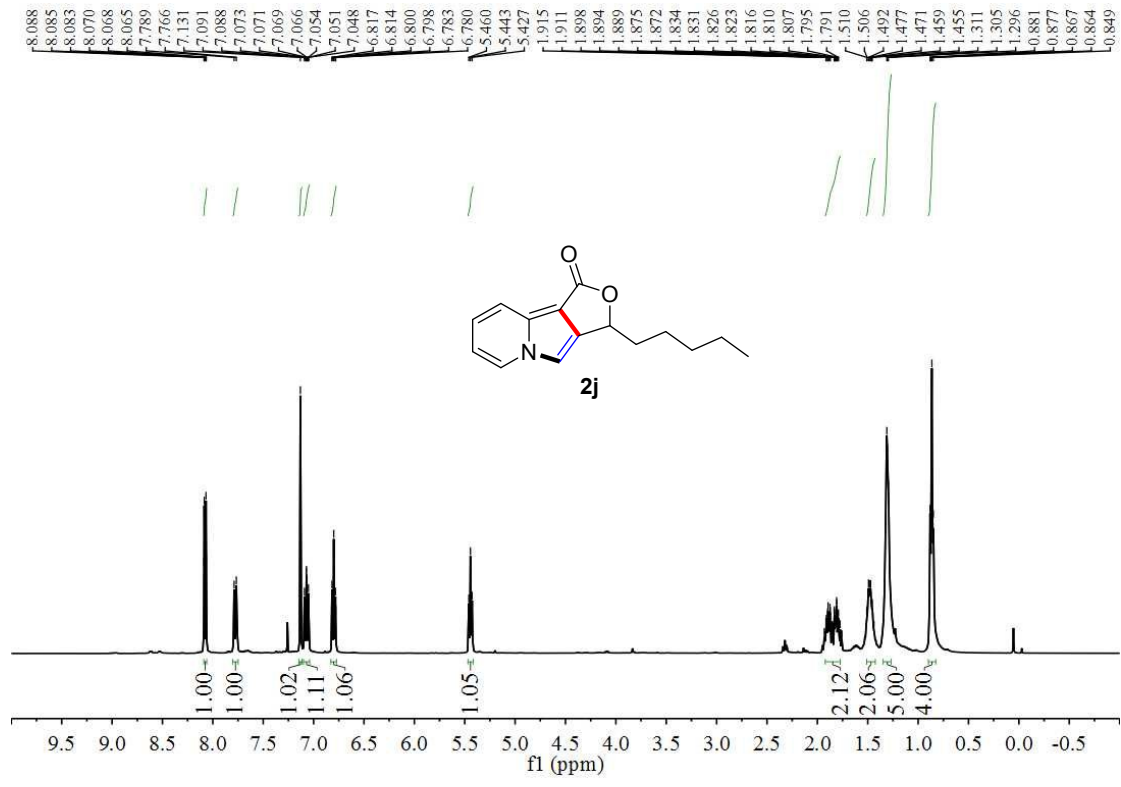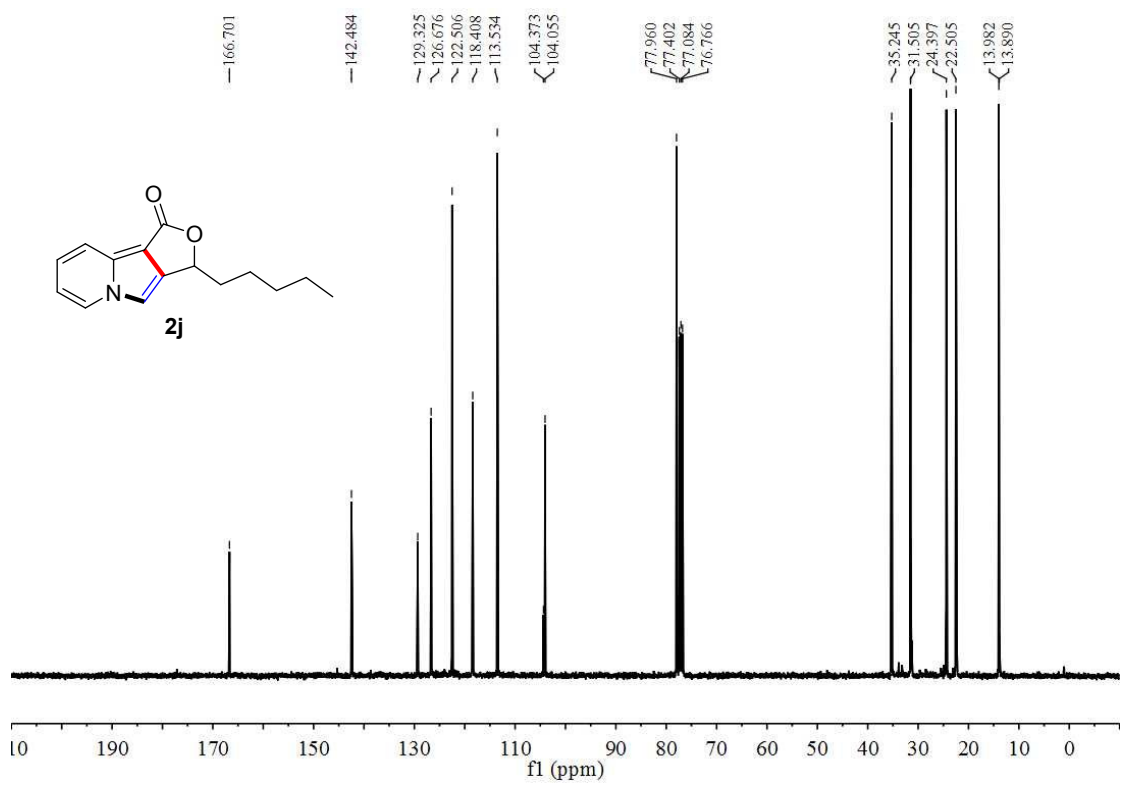

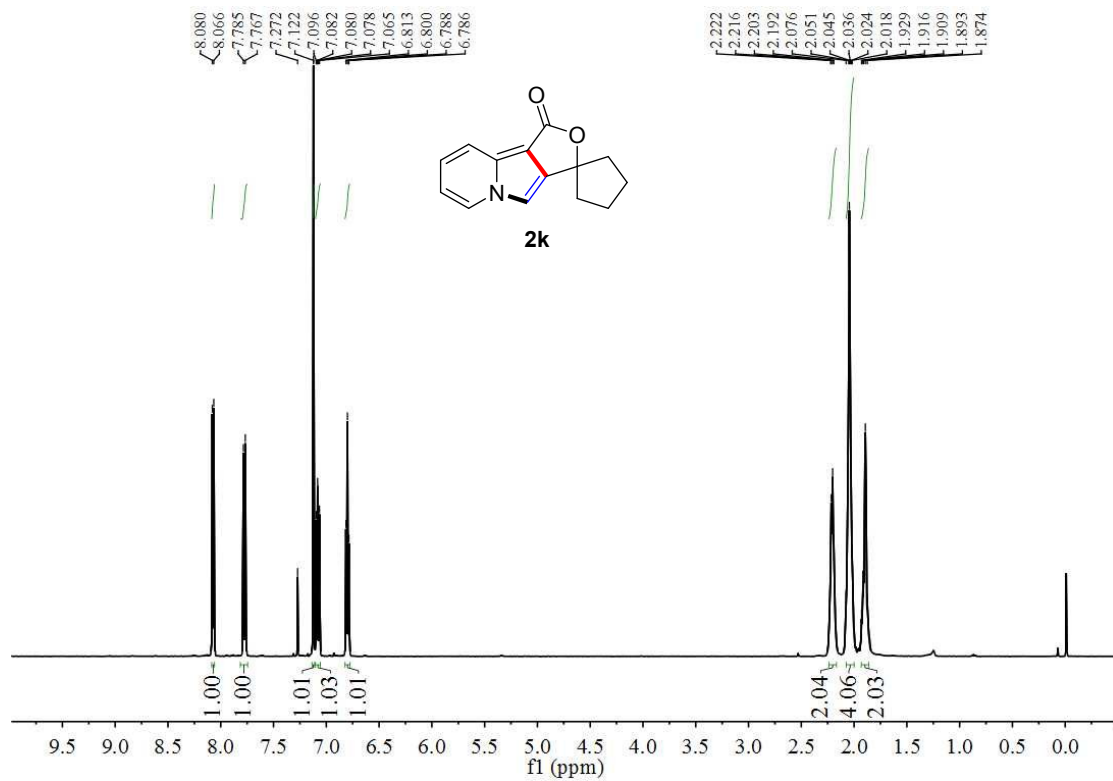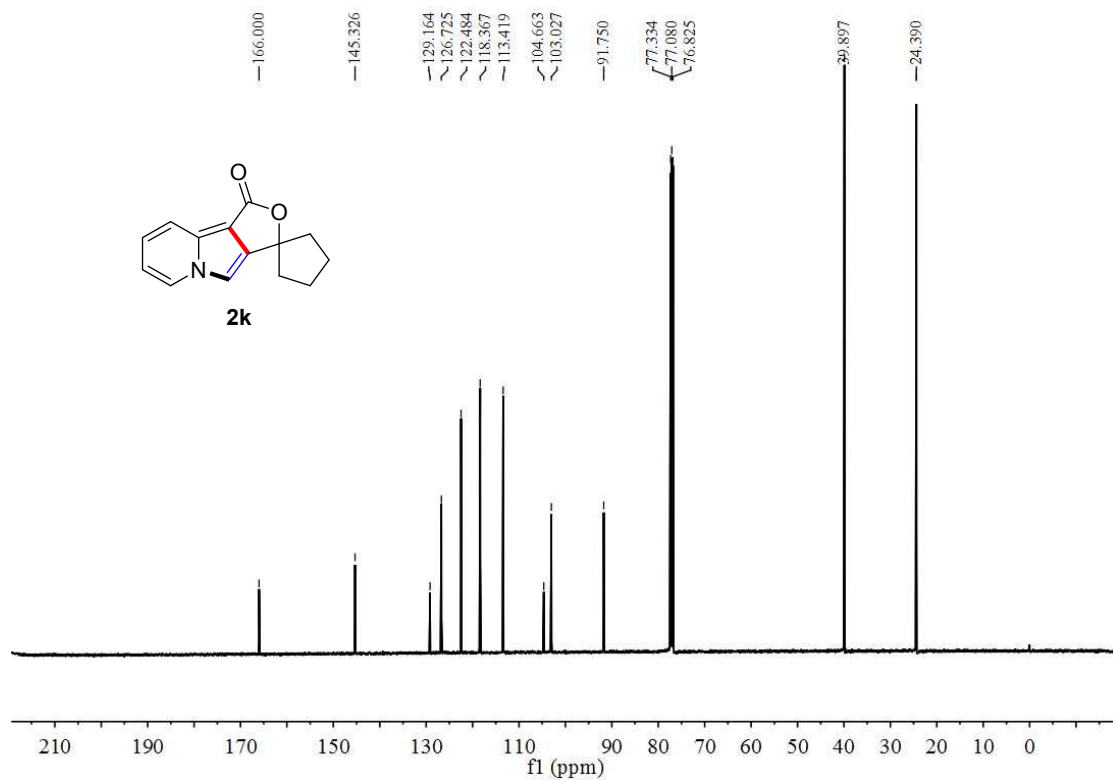



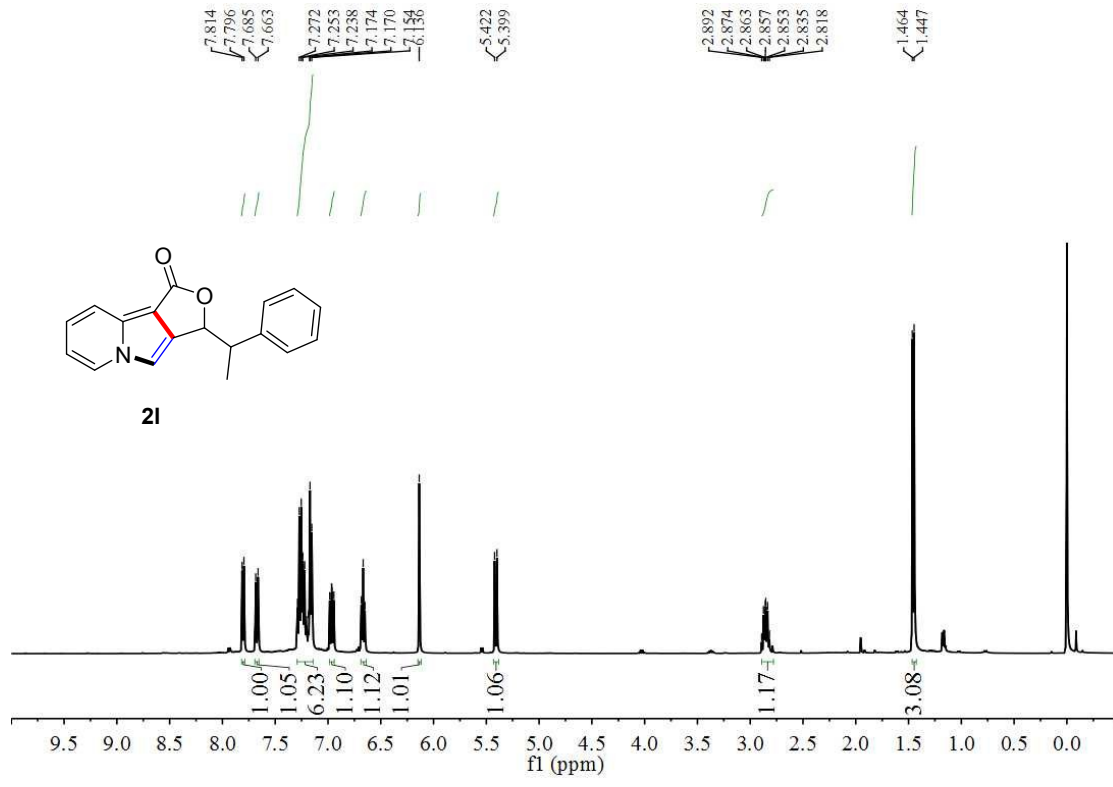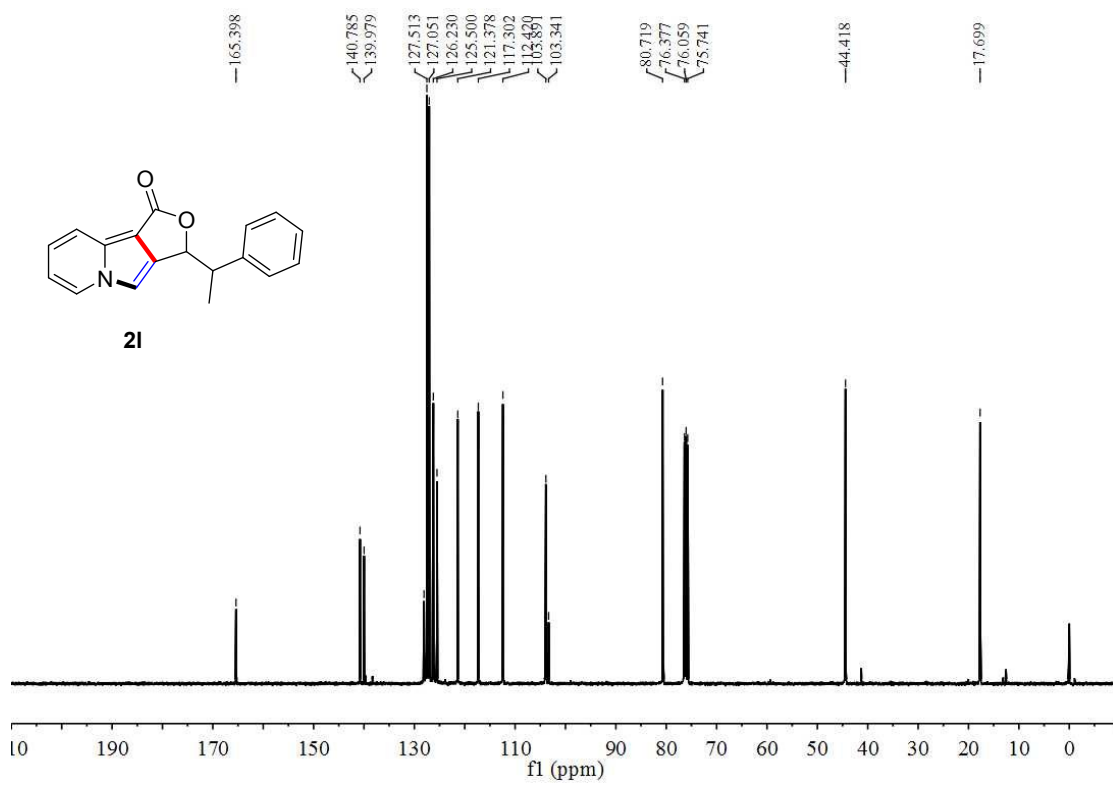

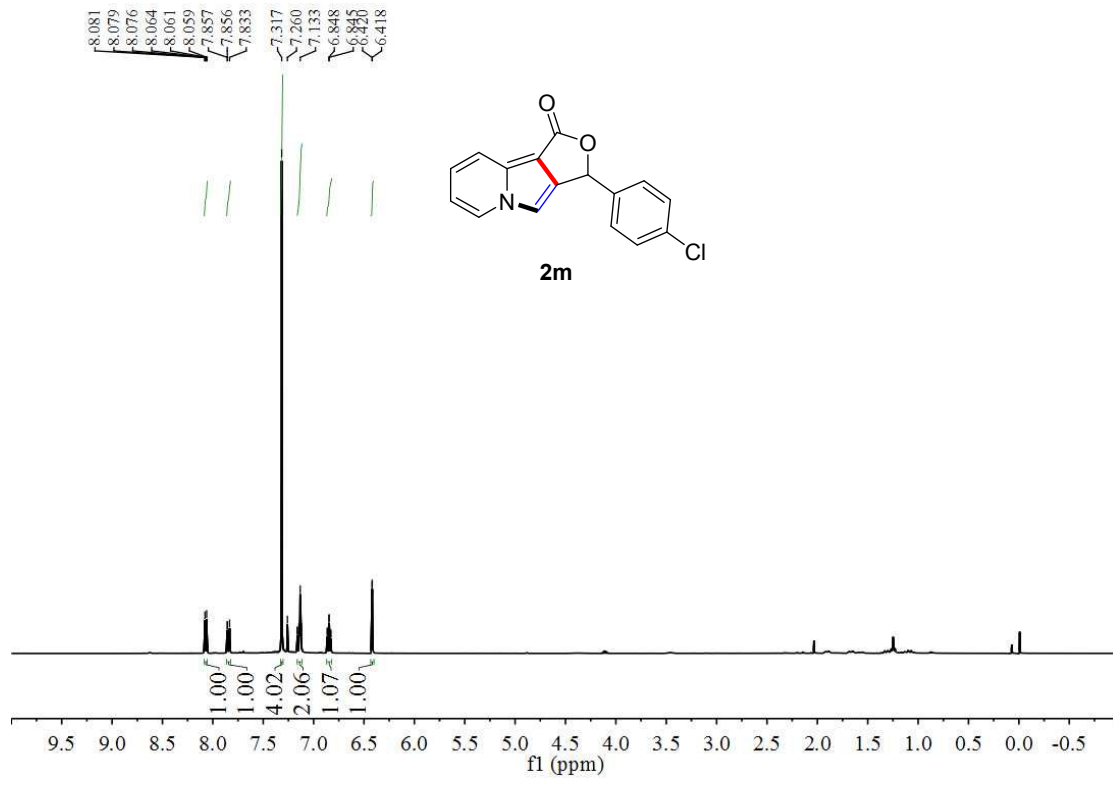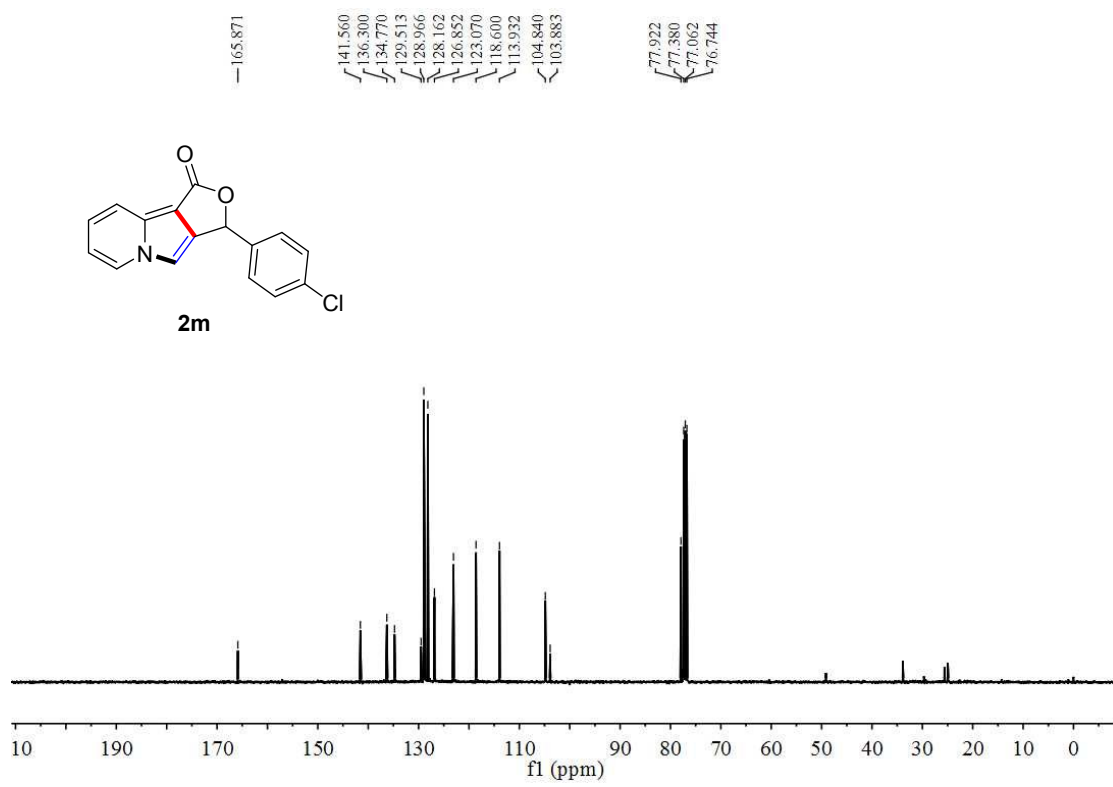

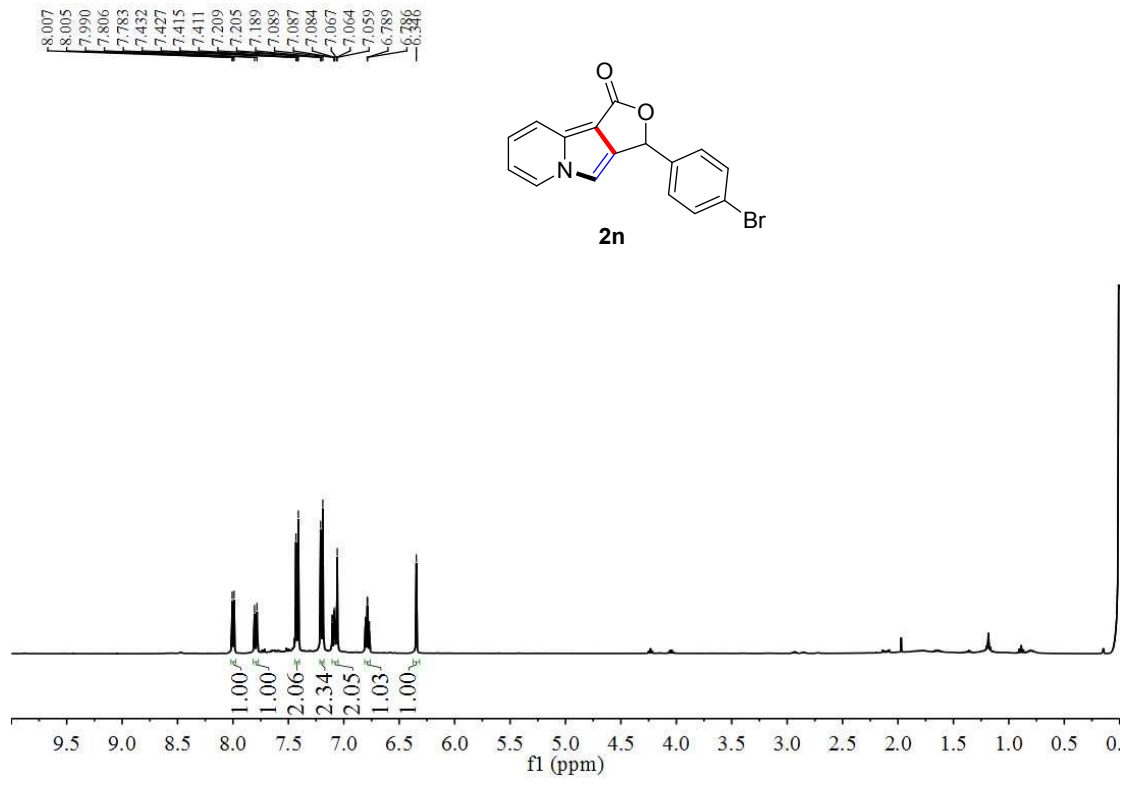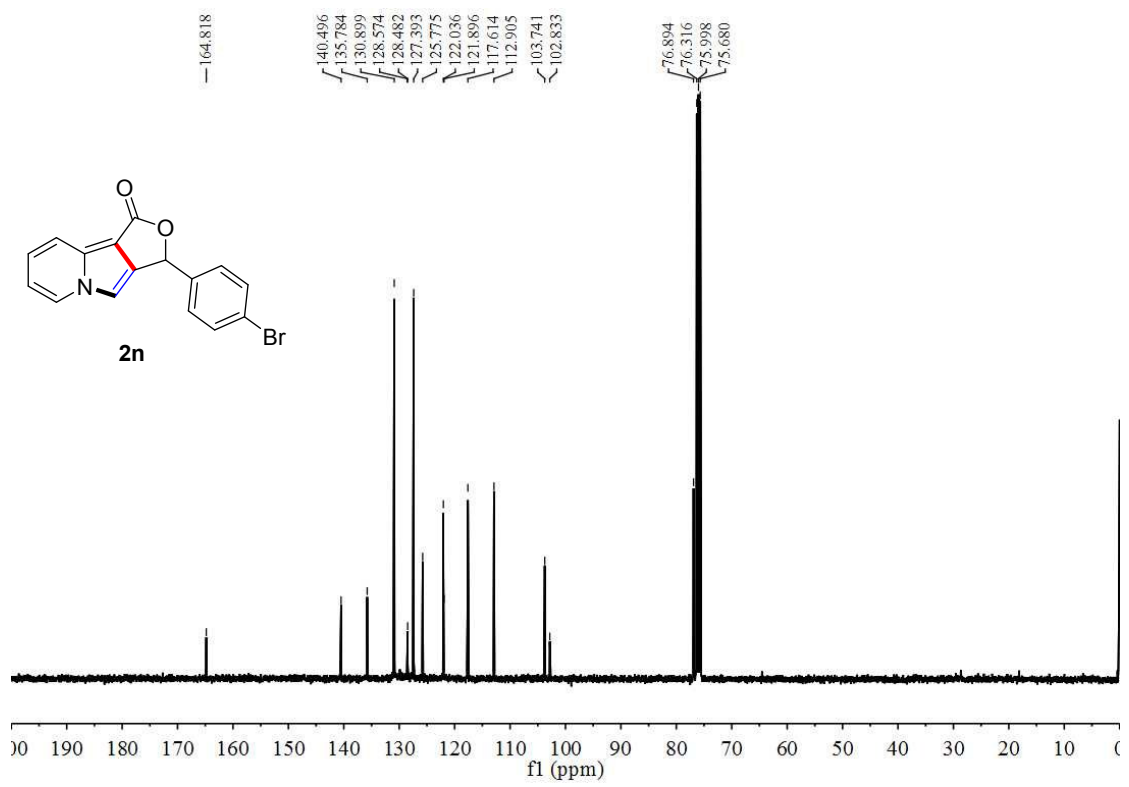

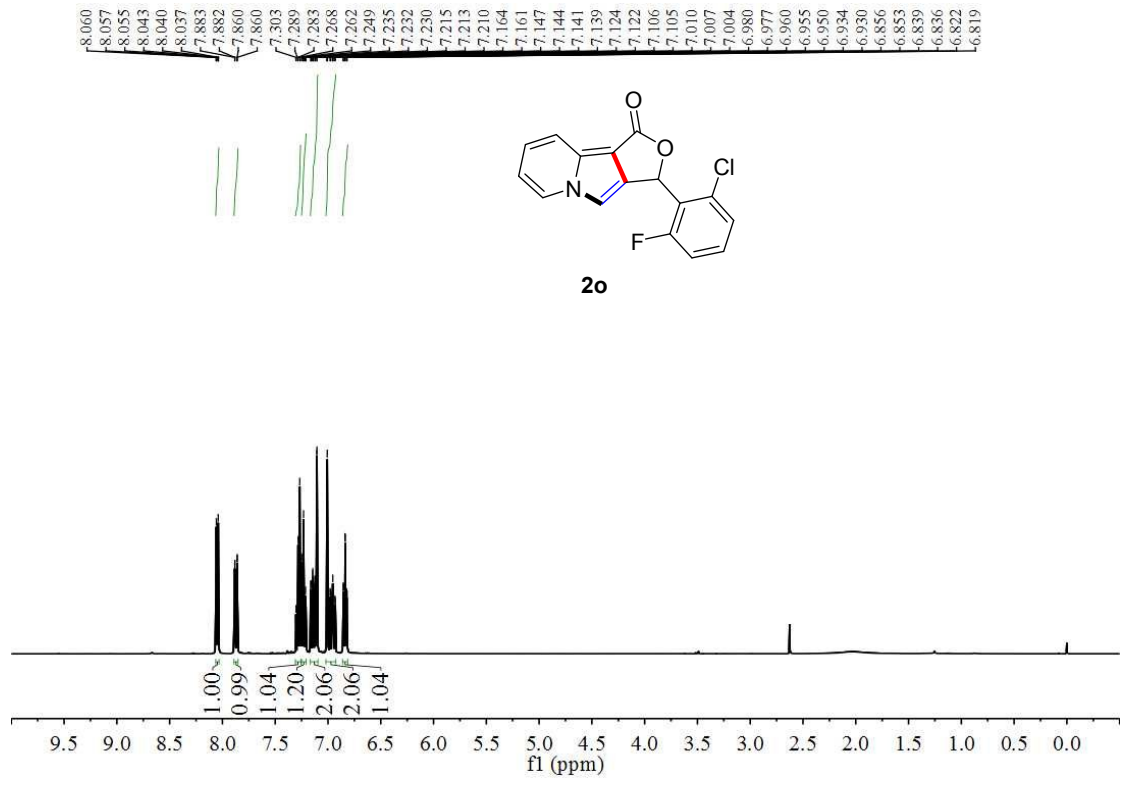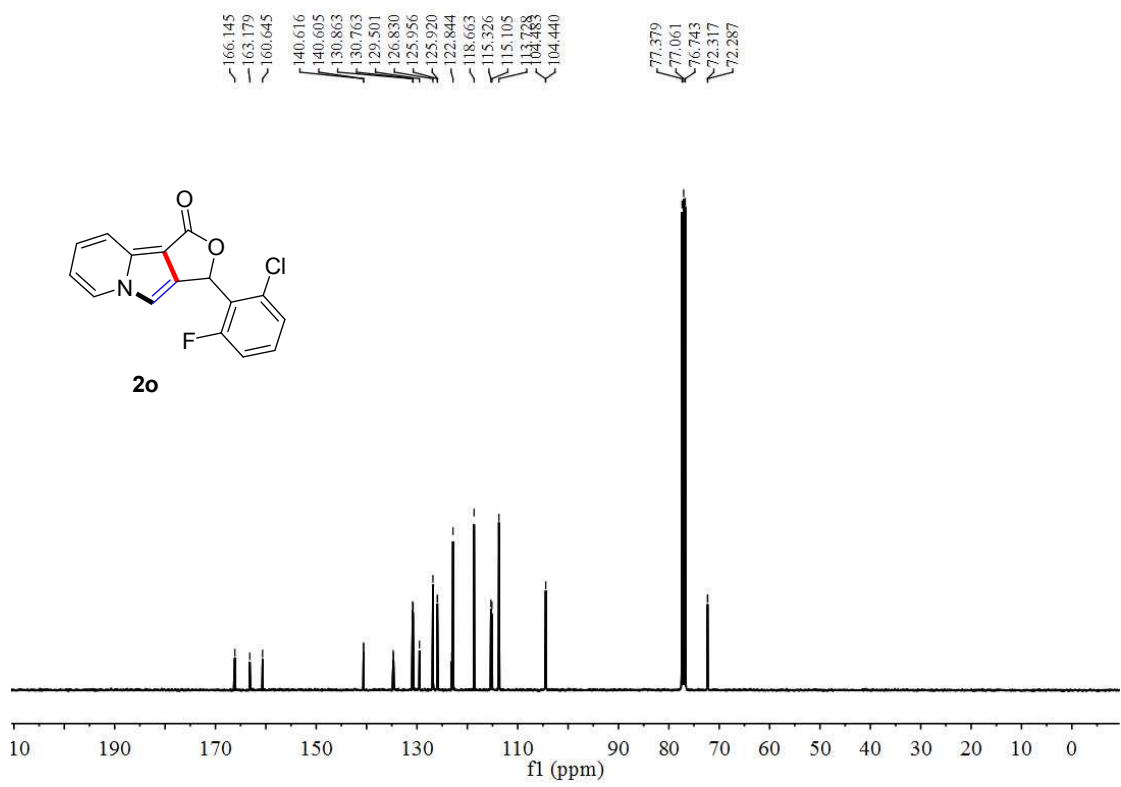

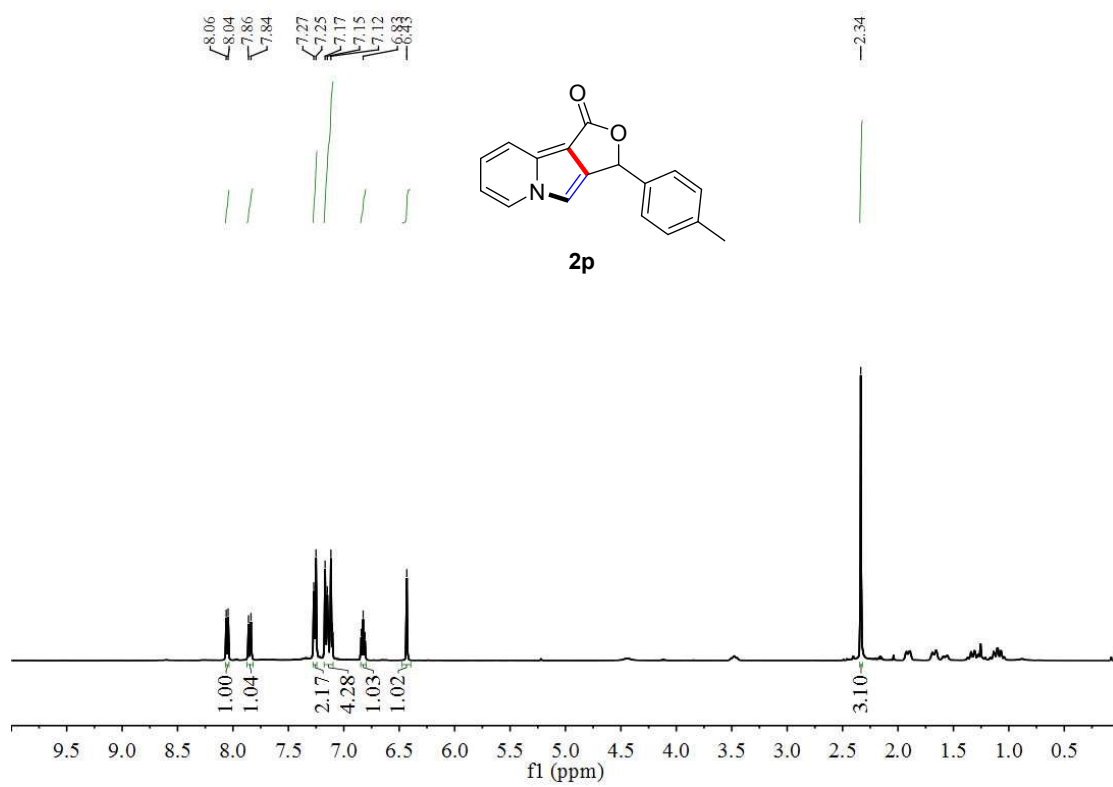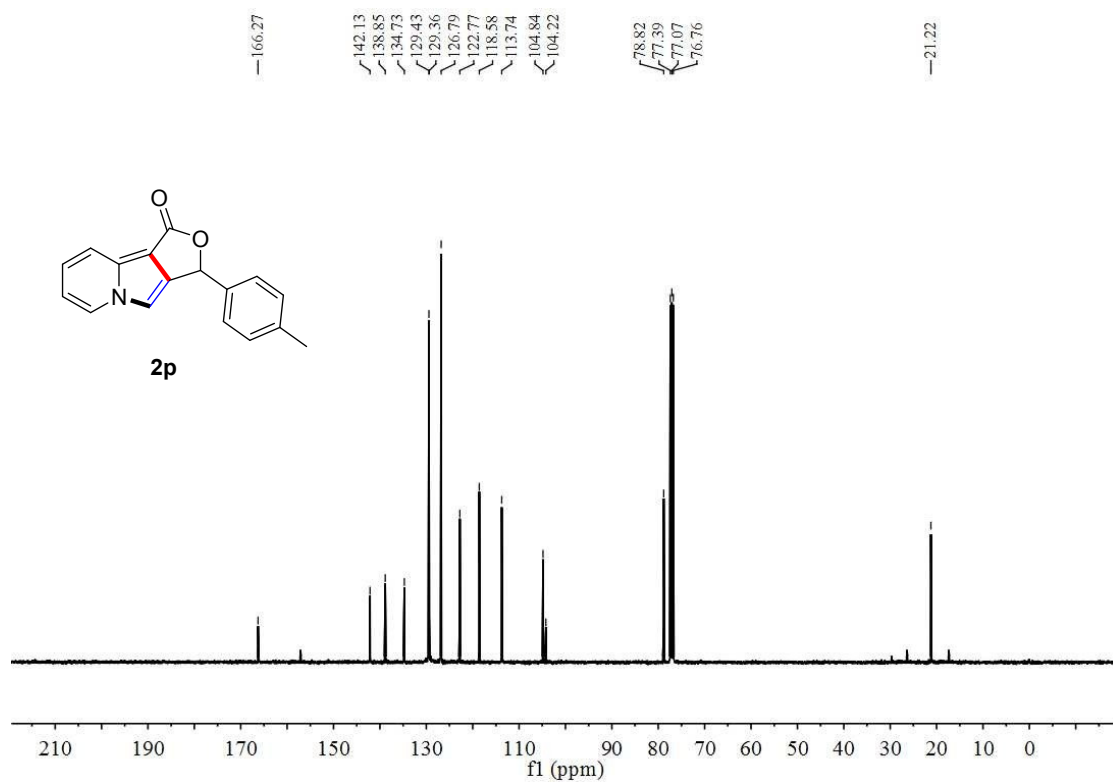

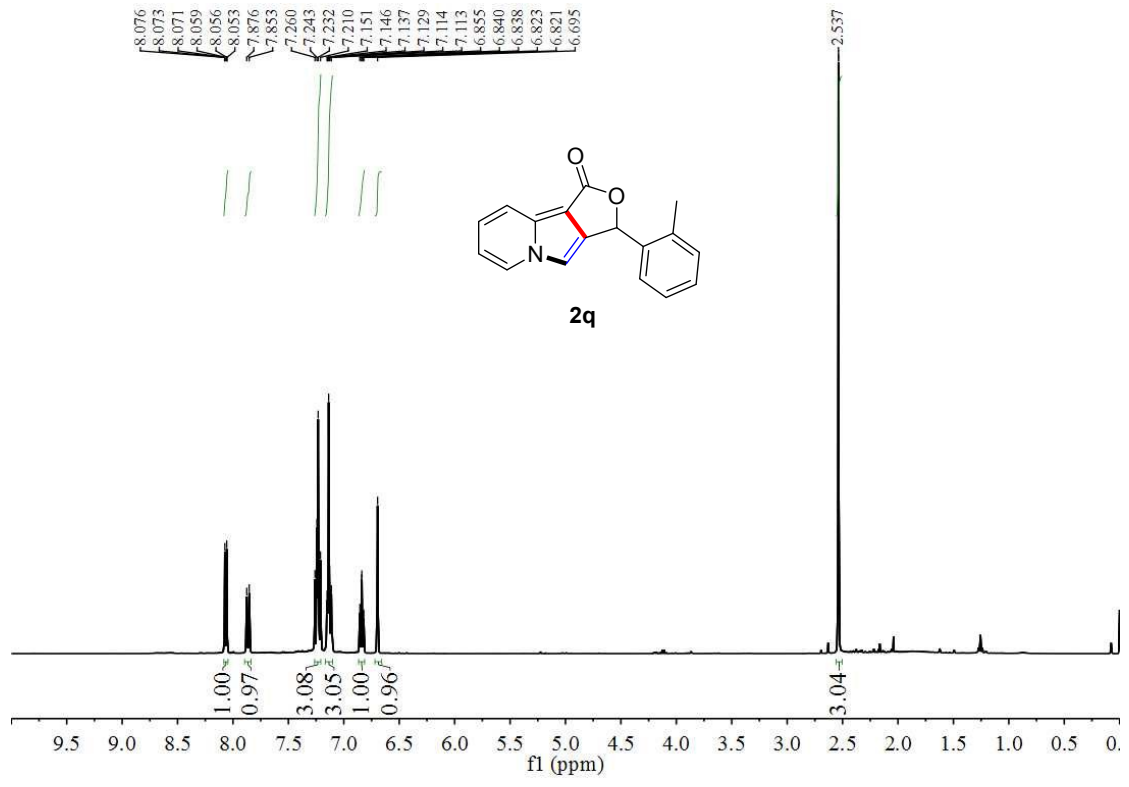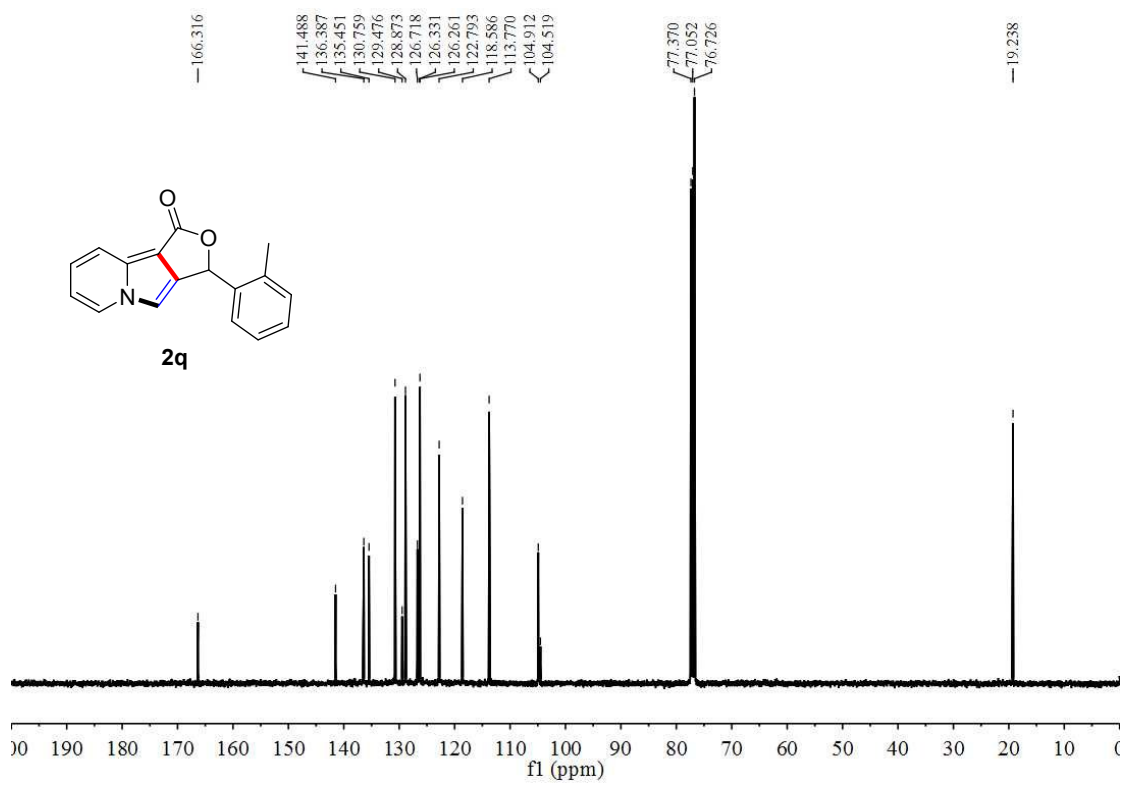

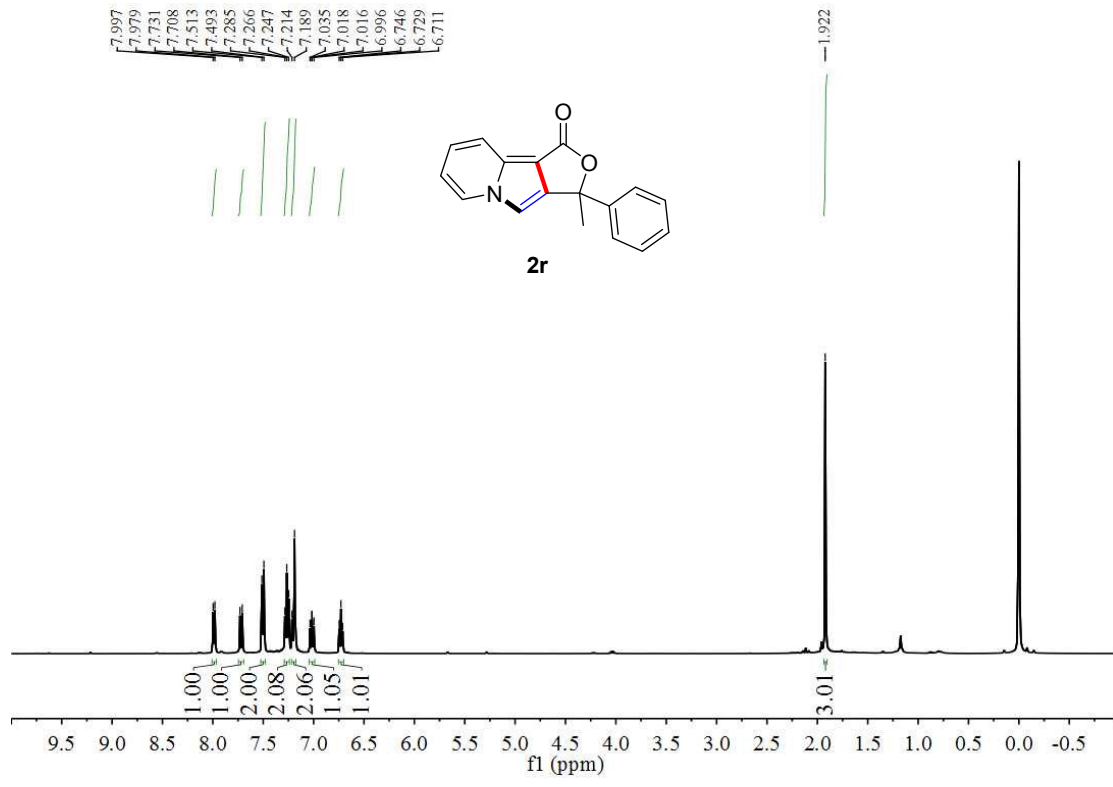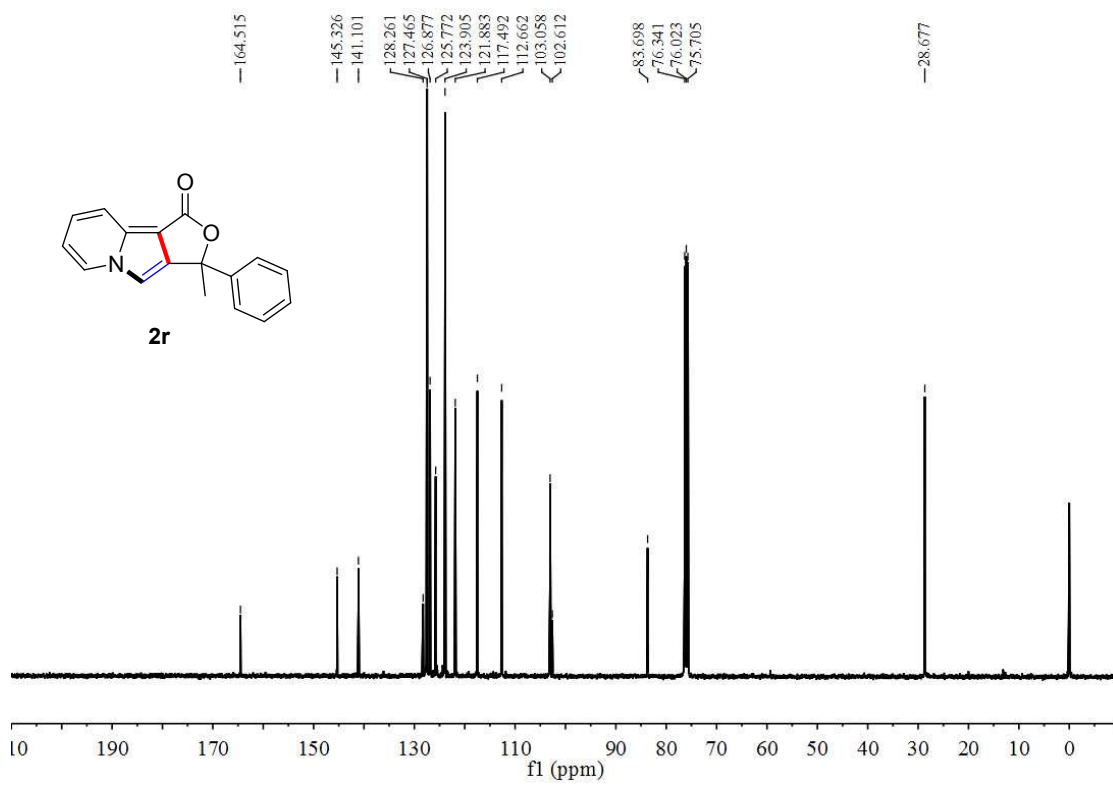

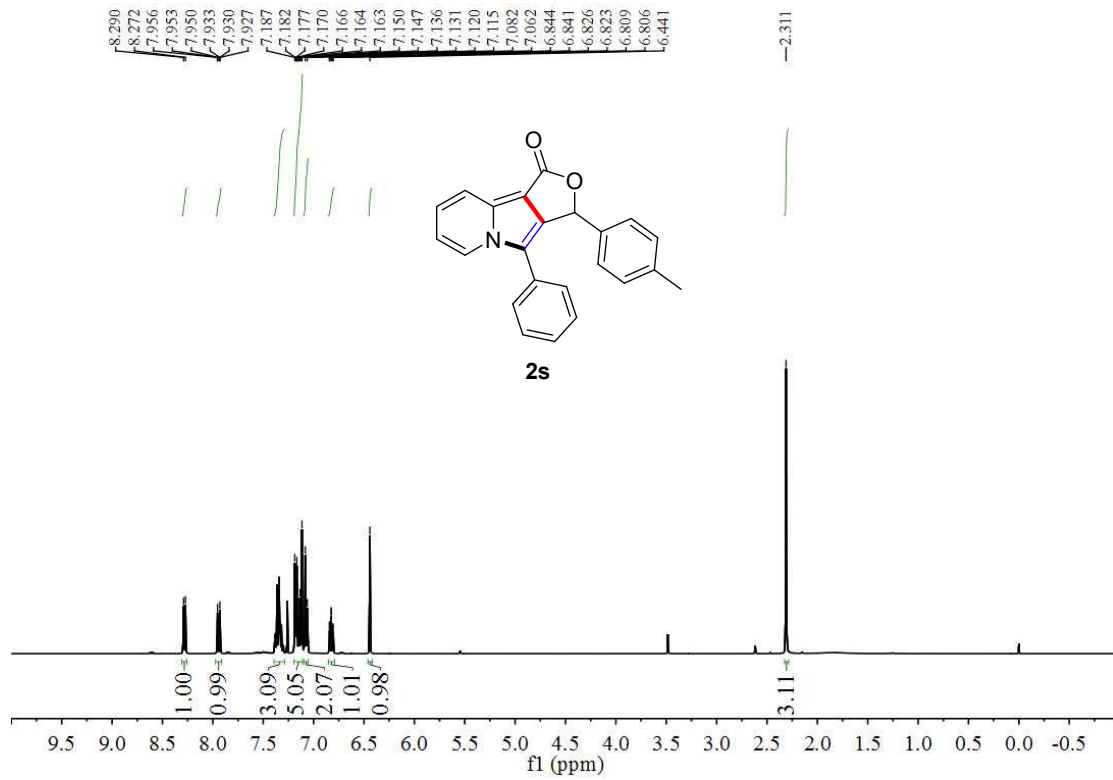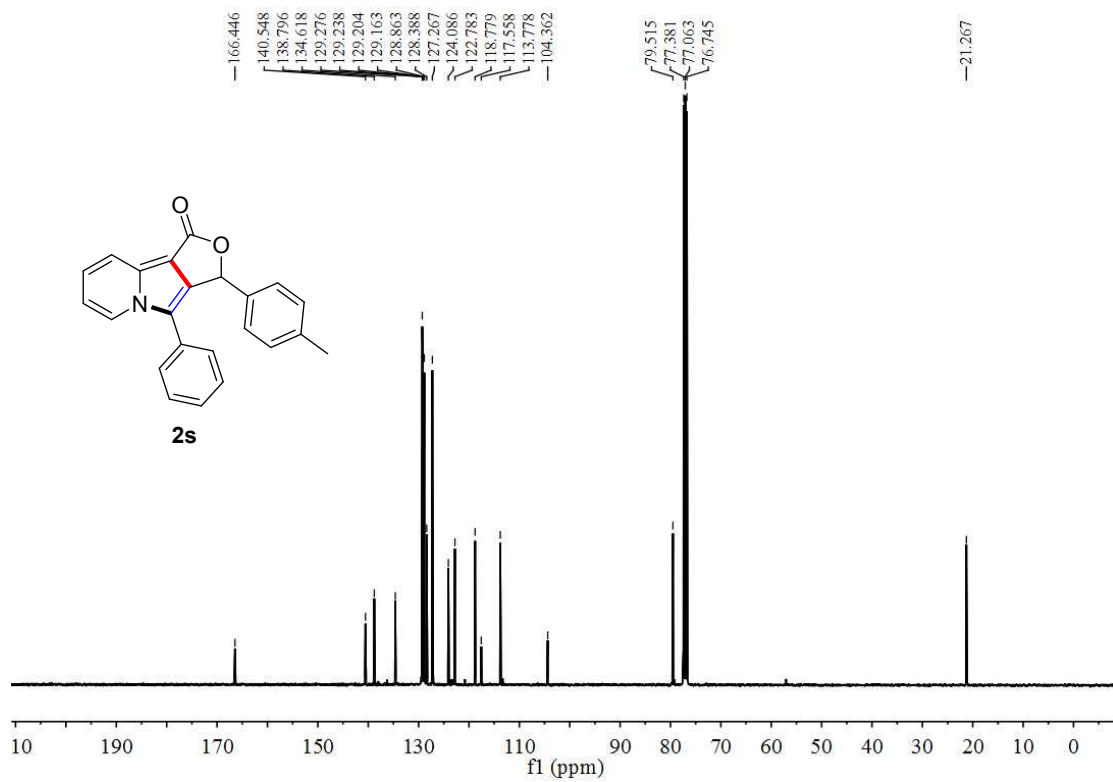



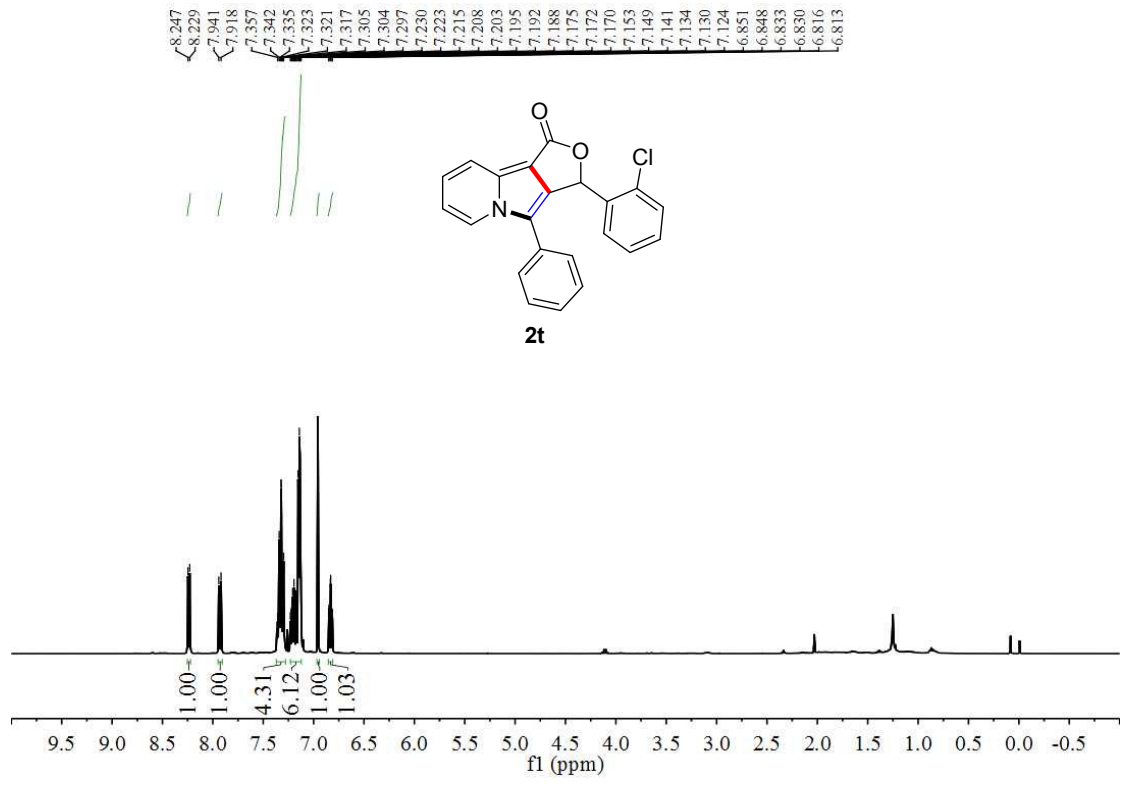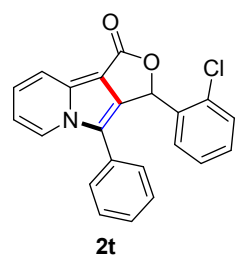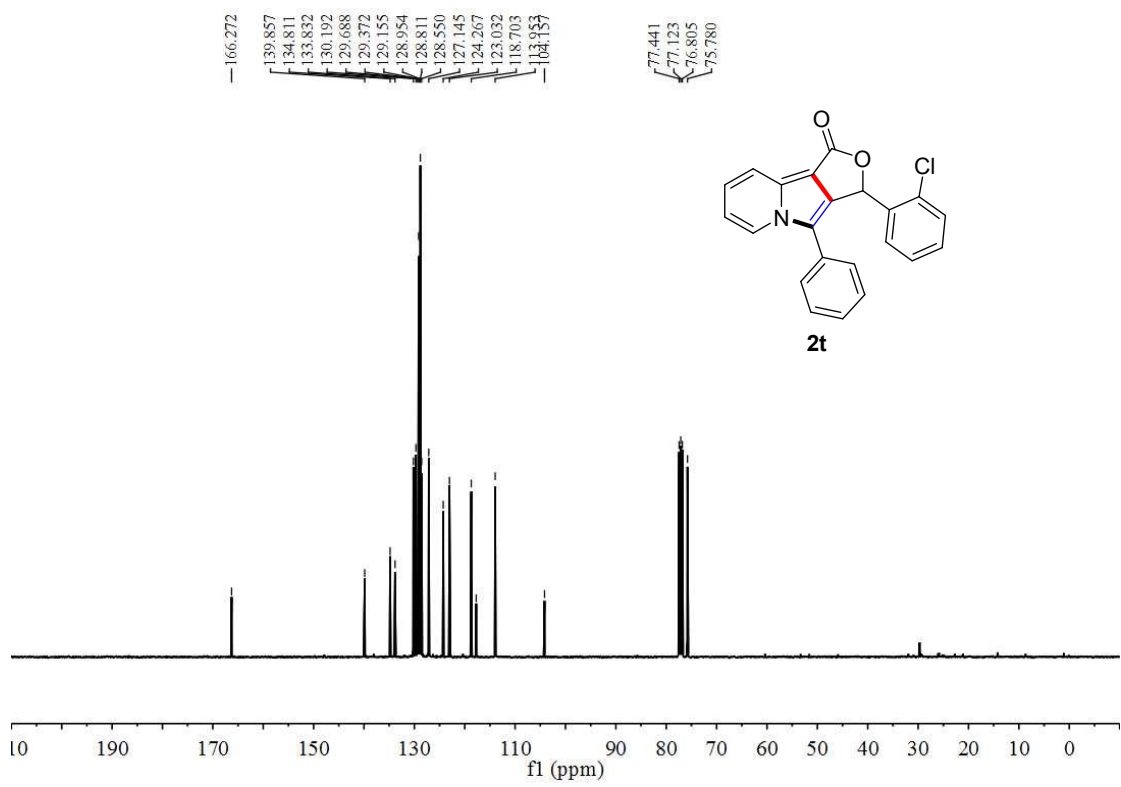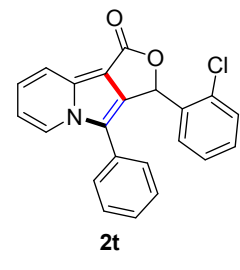

Supplement: c7ra00892a1.pdf [file c7ra00892a1.pdf]
